# Supplementary material for: Three-Component Reaction of Benzylamines, Diethyl Phosphite and Triethyl Orthoformate: Dependence of the Reaction Course on the Structural Features of the Substrates and Reaction Conditions
Source: MDPI journal article supplement (doi:10.3390/molecules22030450), 2017-03-11
Supplement: s1 [file s1]

## Supporting information

### Three-component reaction of benzylamines, diethyl phosphite and triethyl orthoformate: Dependence of the reaction course on the structural features of the substrates and reaction conditions

Patrycja Miszczyk<sup>1</sup>, I. Turowska-Tyrk<sup>2</sup>, Paweł Kafarski<sup>1</sup>, Ewa Chmielewska<sup>1,\*</sup>

<sup>a</sup> Department of Bioorganic Chemistry, Faculty of Chemistry, Wrocław University of Science and Technology,  
Wybrzeże Wyspiańskiego 27, 50-370 Wrocław

<sup>b</sup> The Advanced Materials Engineering and Modelling Group, Faculty of Chemistry, Wrocław University of  
Science and Technology, Wybrzeże Wyspiańskiego 27, 50-370 Wrocław

<sup>31</sup>P NMR, <sup>1</sup>H NMR, <sup>13</sup>C NMR and MS spectra for representative compounds and the mixture of reactions

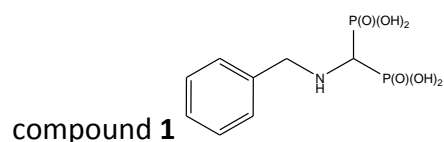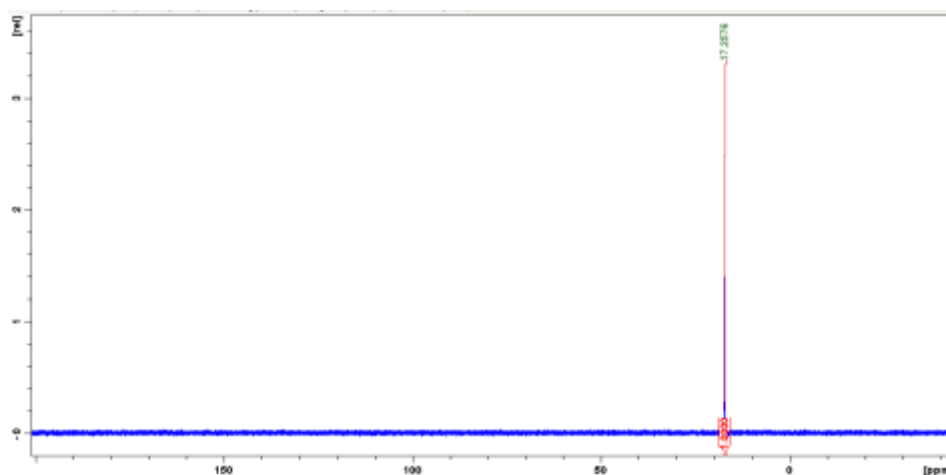

Figure S1. <sup>31</sup>P NMR spectrum of compound **1**

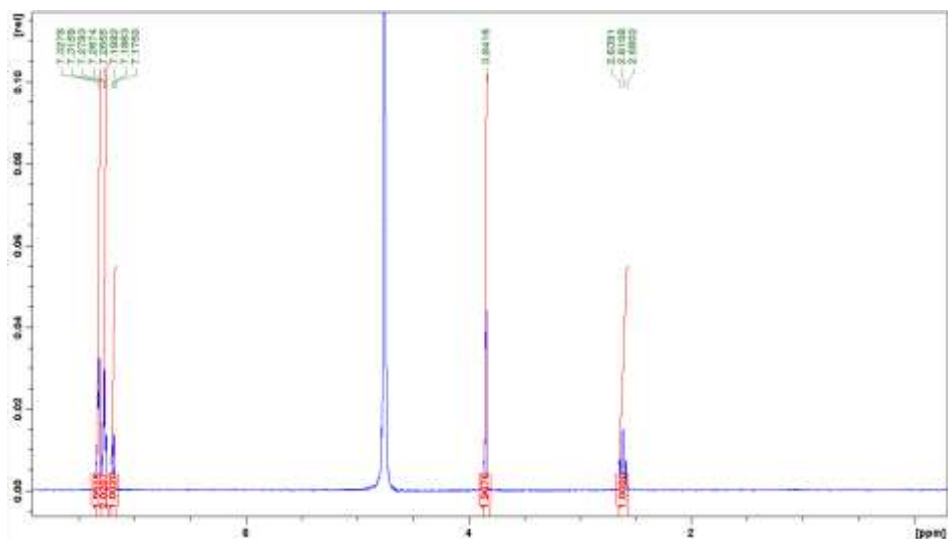

Figure S2.  $^1\text{H}$  NMR spectrum of compound 1

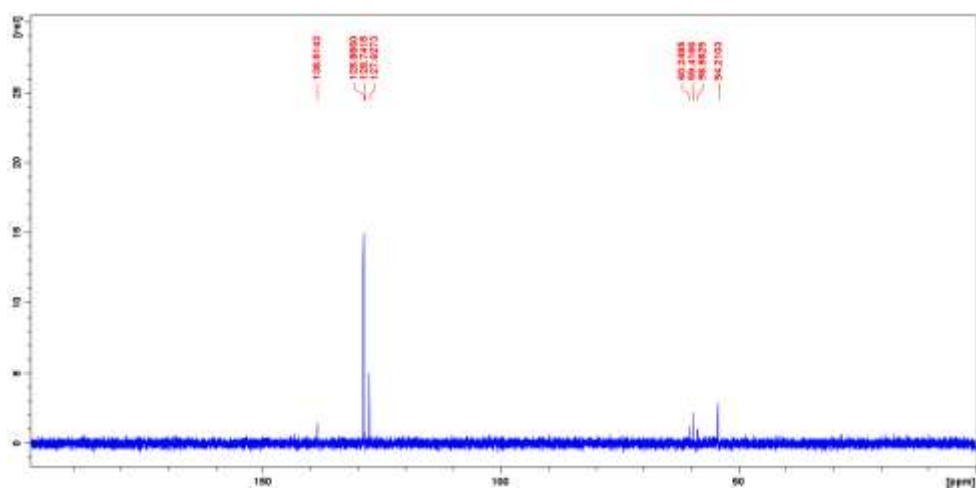

Figure S3.  $^{13}\text{C}$  NMR spectrum of compound 1

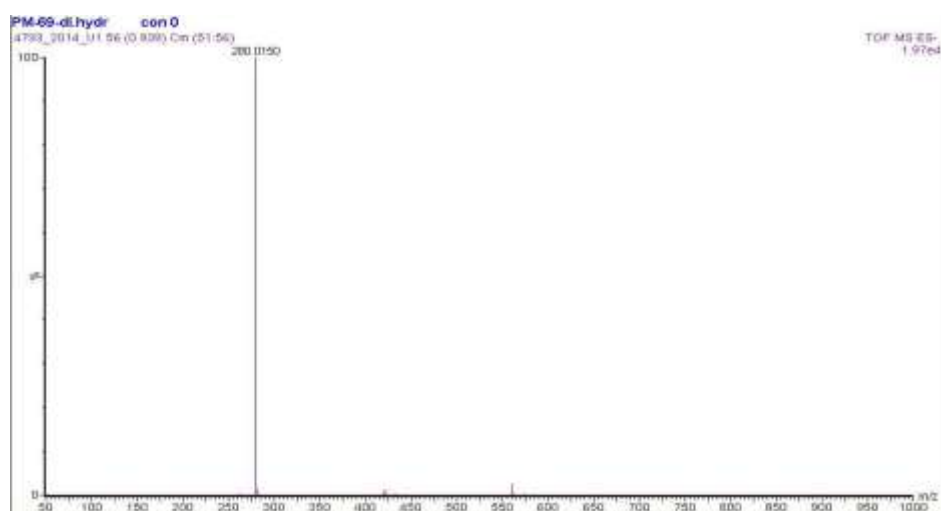

Figure S4. HRMS spectrum of compound 1

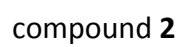 $^{31}\text{P}$  NMR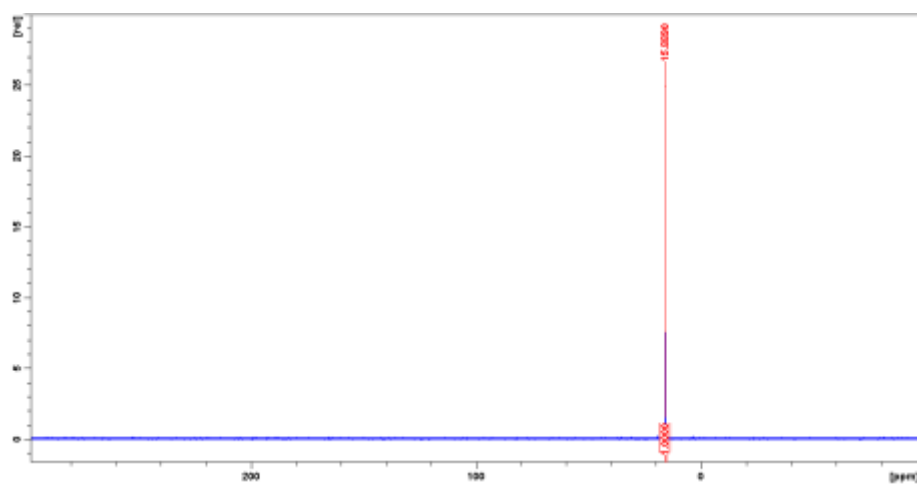

**Figure S5.**  $^{31}\text{P}$  NMR spectrum of compound **2**

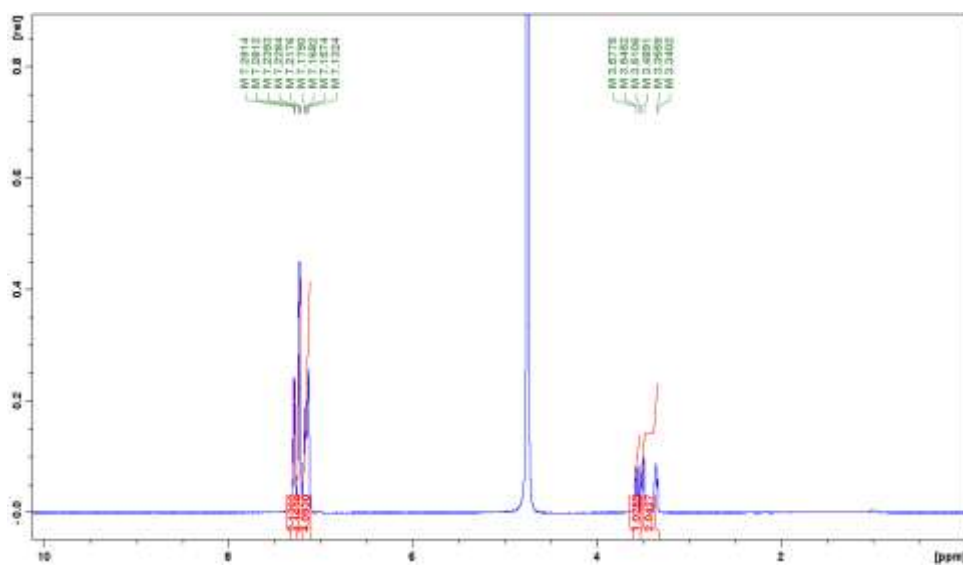

**Figure S6.**  $^1\text{H}$  NMR spectrum of compound **2**

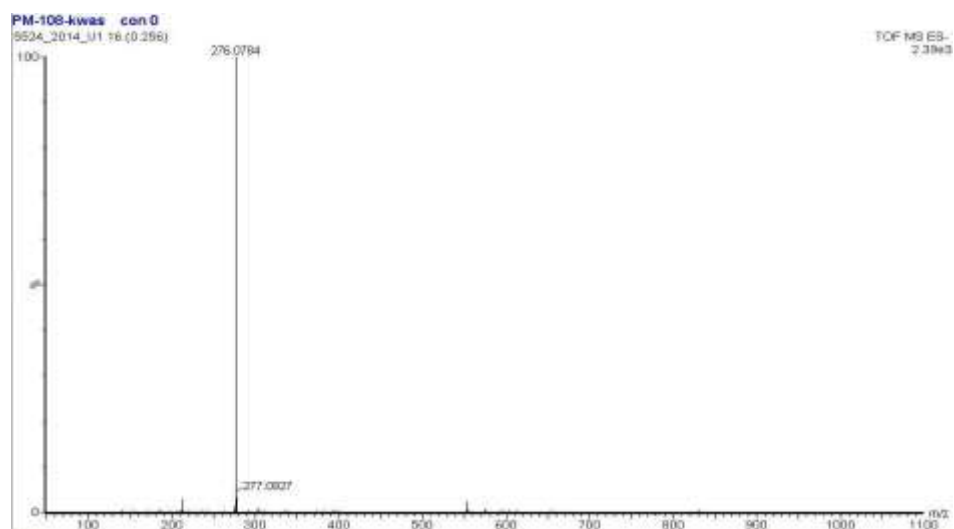

**Figure S7.** HRMS spectrum of compound **2**

mixture of compounds **1** and **2**

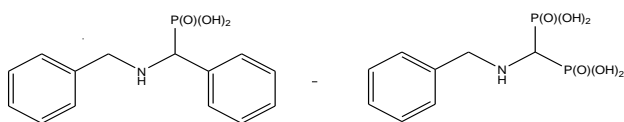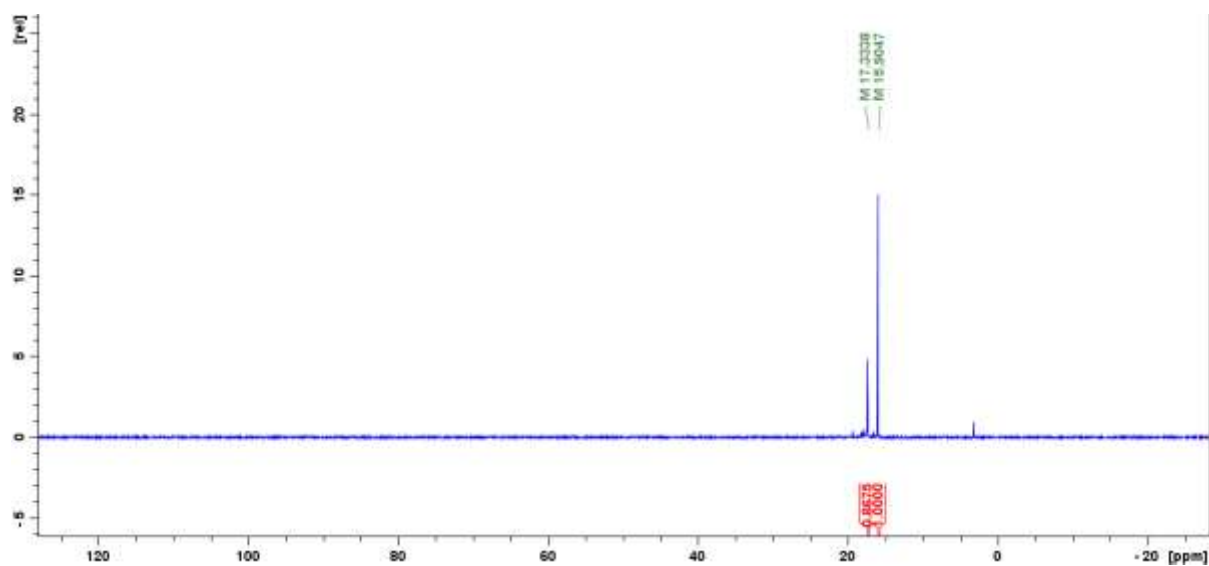

**Figure S8.**  $^{31}\text{P}$  NMR spectrum of mixture of compounds **1** and **2**

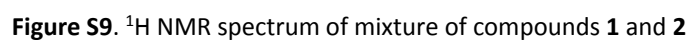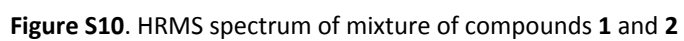

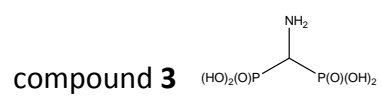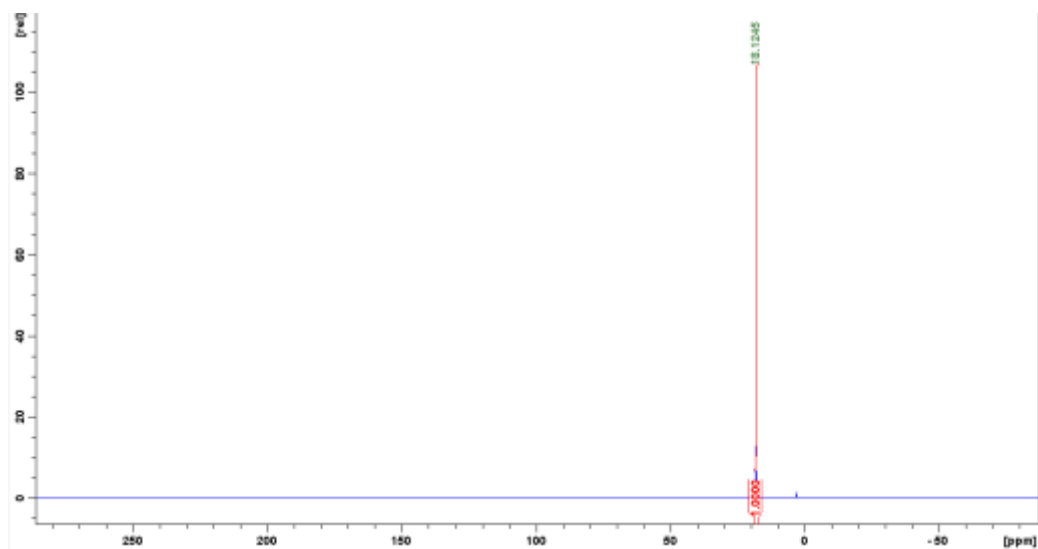

Figure S11.  $^{31}\text{P}$  NMR spectrum of compound **3**

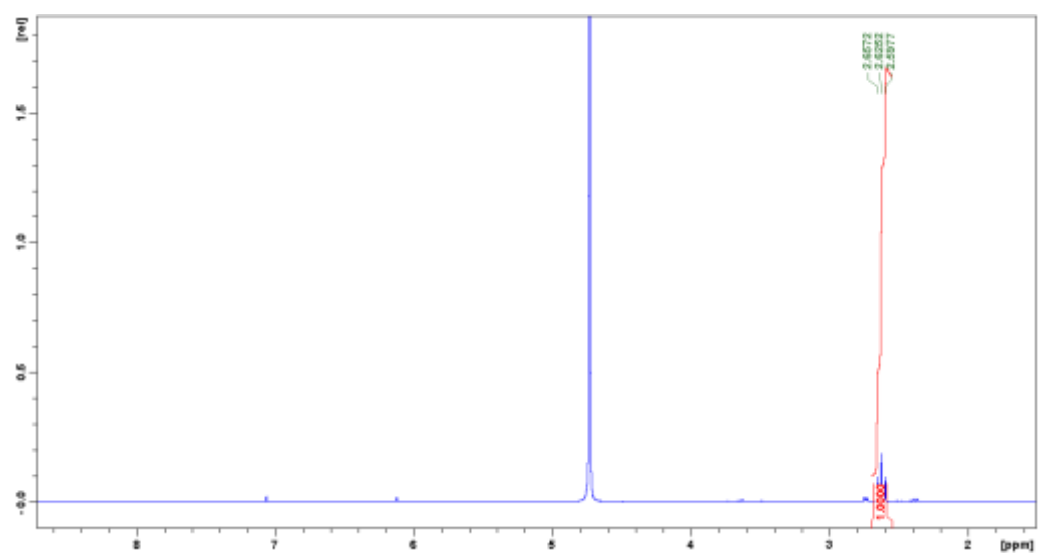

Figure S12.  $^1\text{H}$  NMR spectrum of compound **3**

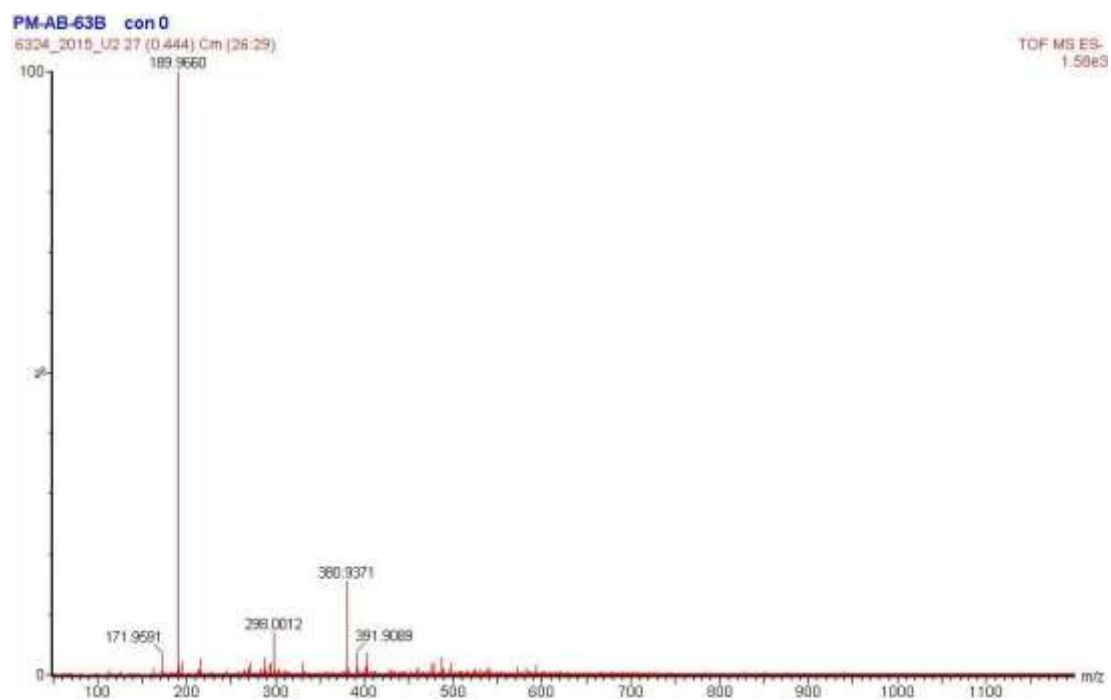

**Figure S13.** HRMS spectrum of compound **3**

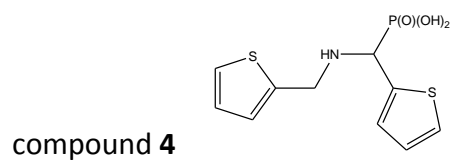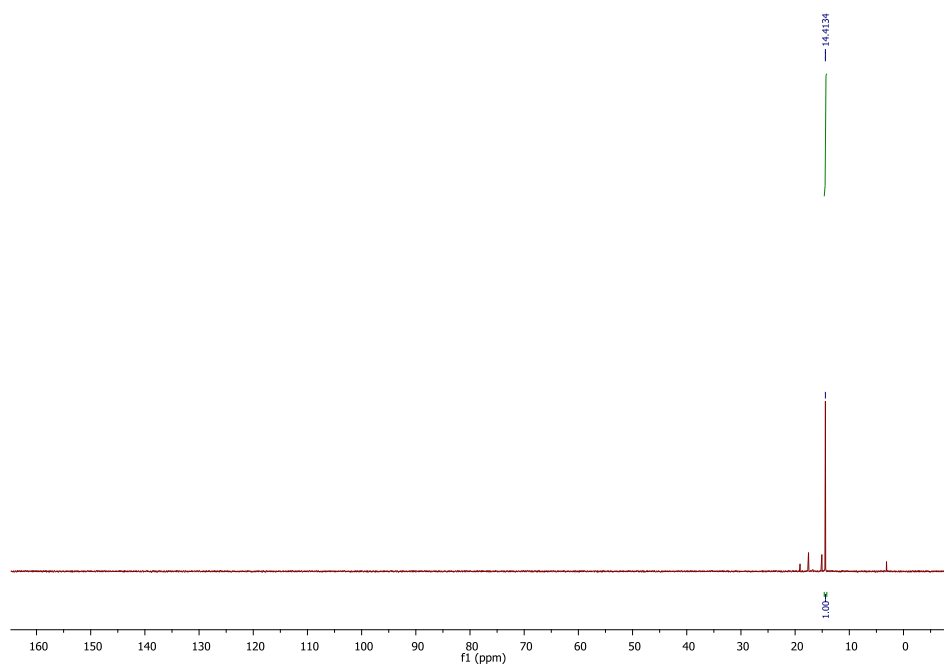

**Figure S14.**  $^{31}\text{P}$  NMR spectrum of compound **4**

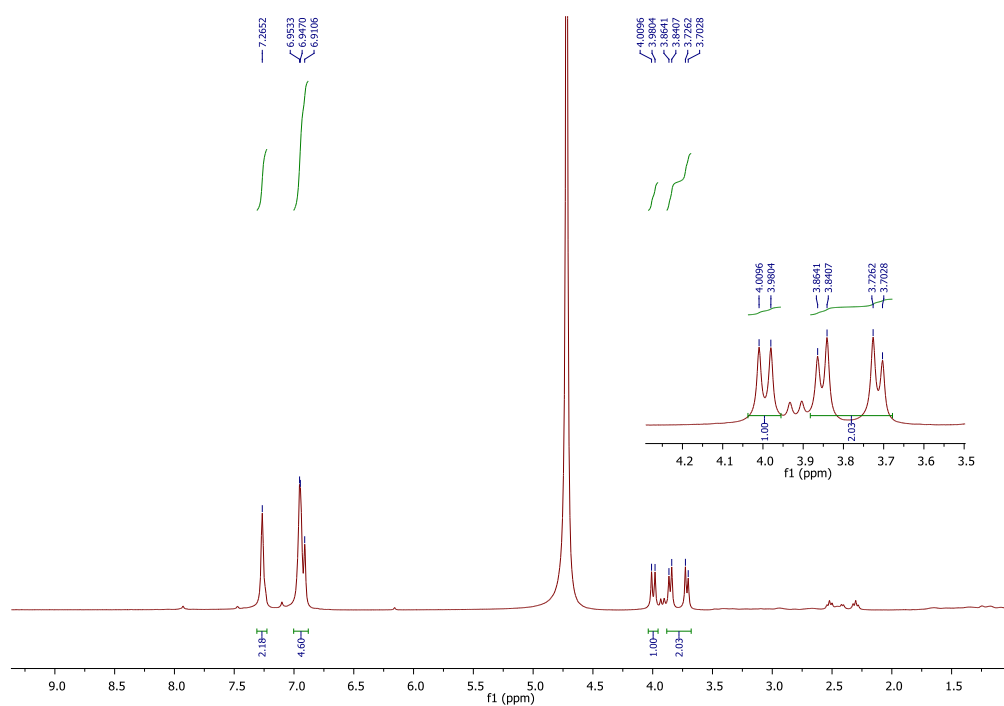

Figure S15. <sup>1</sup>H NMR spectrum of compound **4**

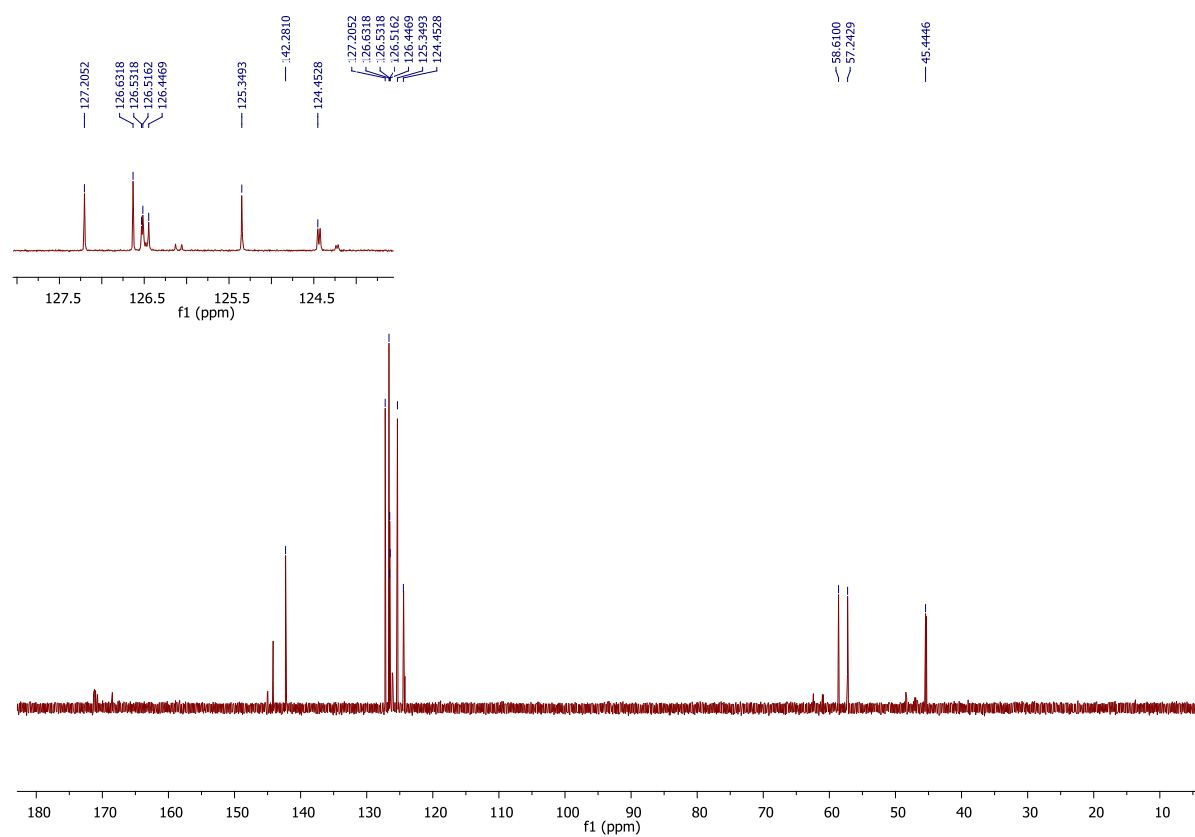

Figure S16. <sup>13</sup>C NMR spectrum of compound **4**



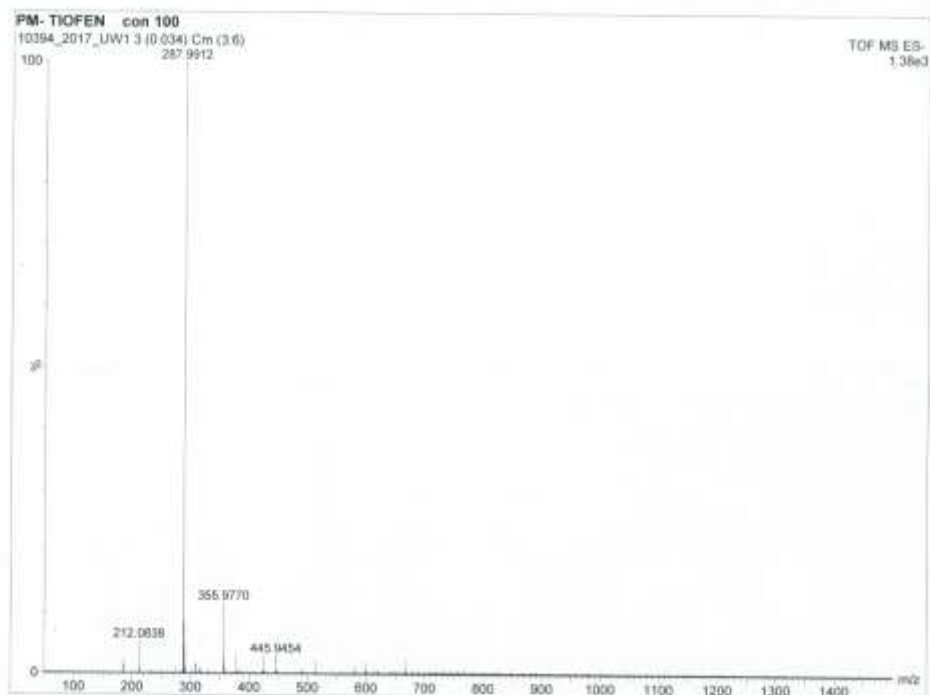

**Figure S17.** HRMS spectrum of compound **4**

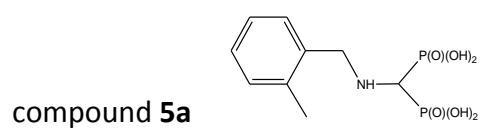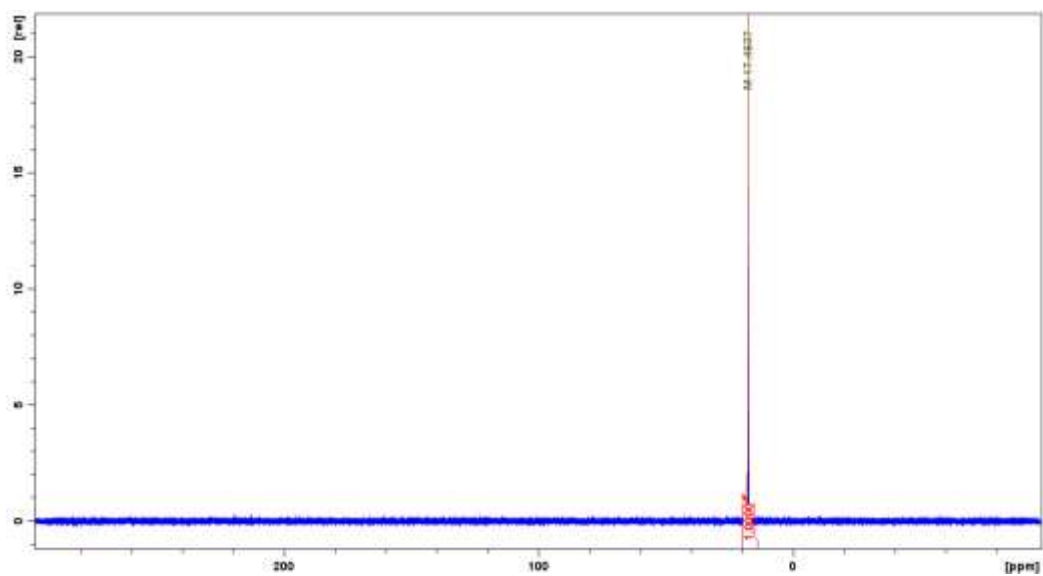

**Figure S18.**  $^{31}\text{P}$  NMR spectrum of compound **5a**

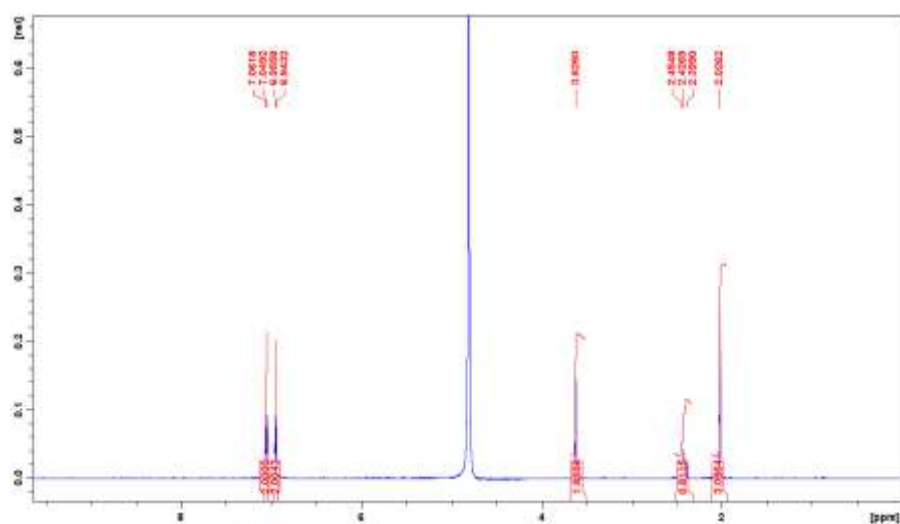

Figure S19.  $^1\text{H}$  NMR spectrum of compound 5a

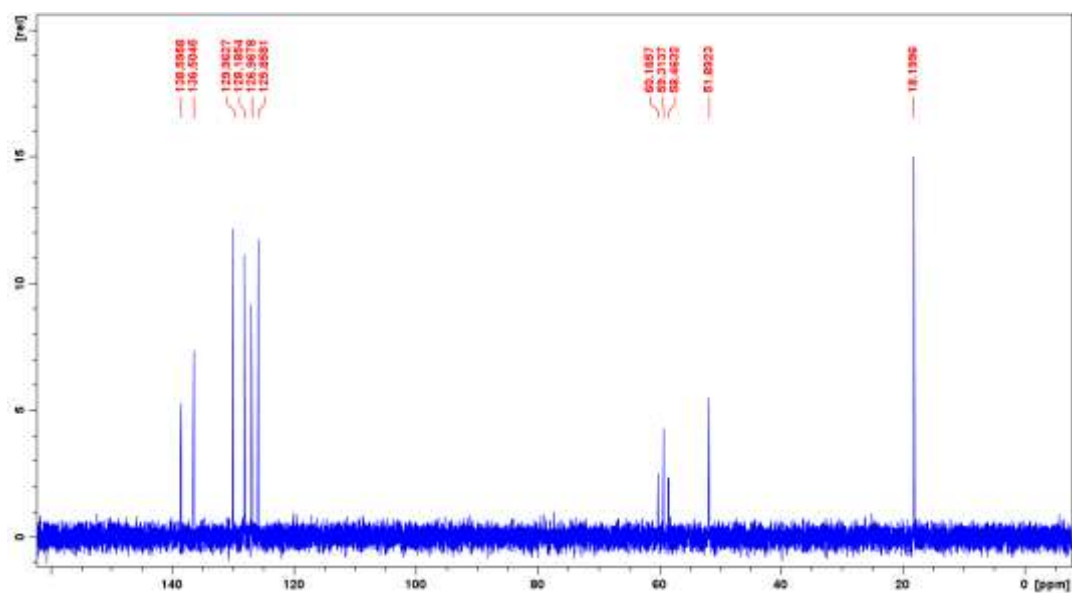

Figure S20.  $^{13}\text{C}$  NMR spectrum of compound 5a

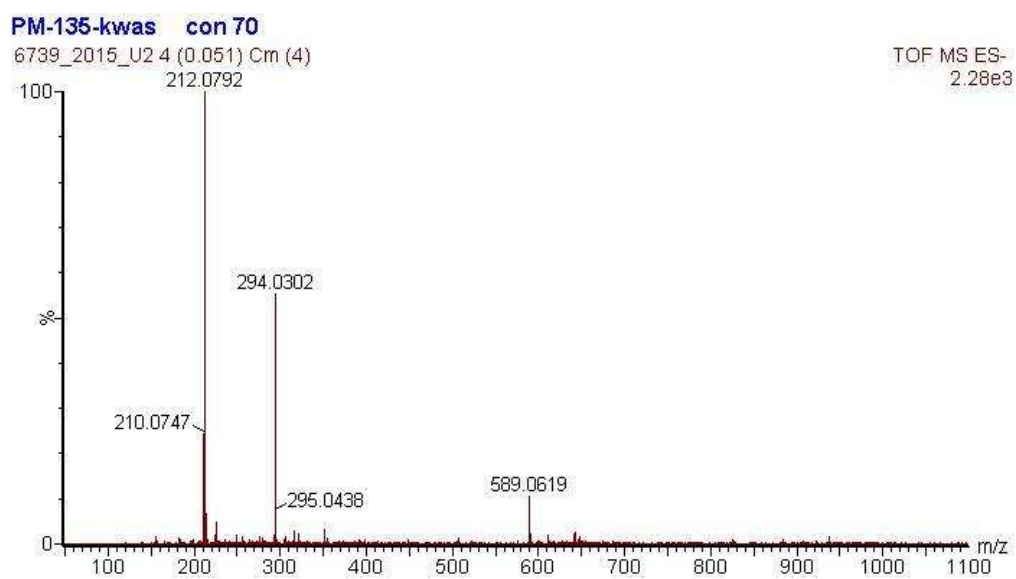

Figure S21. HRMS spectrum of compound **5a**

mixture of compounds **5a** and **6a**

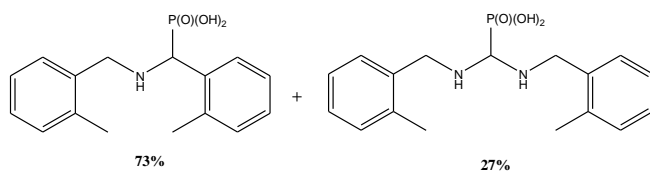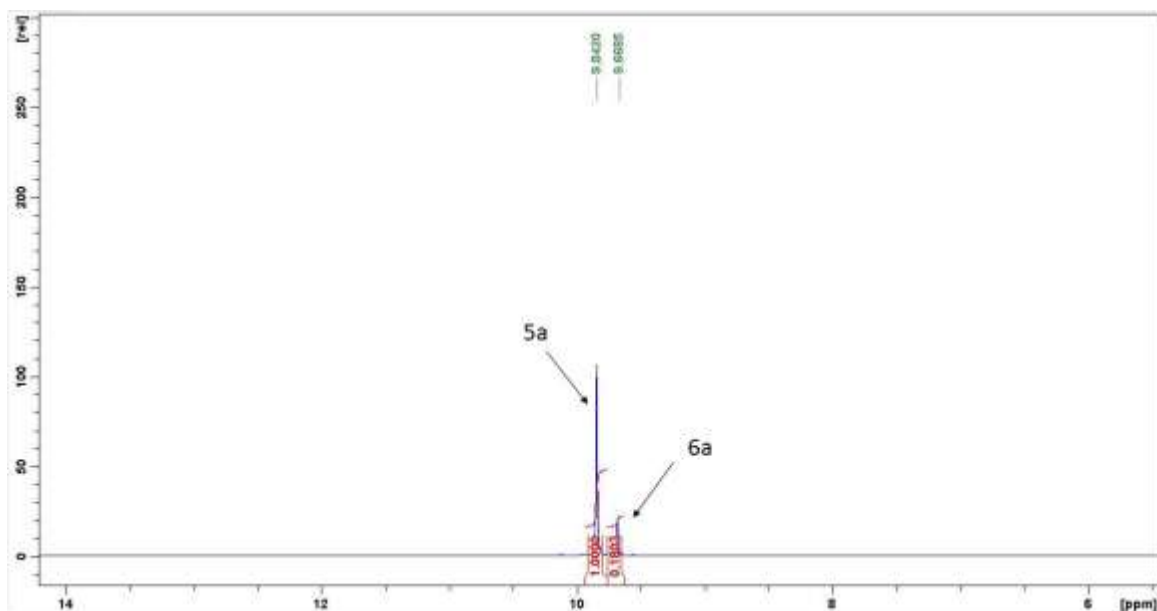

Figure S22.  $^{31}\text{P}$  NMR spectrum of mixture of compounds **5a** and **6a**



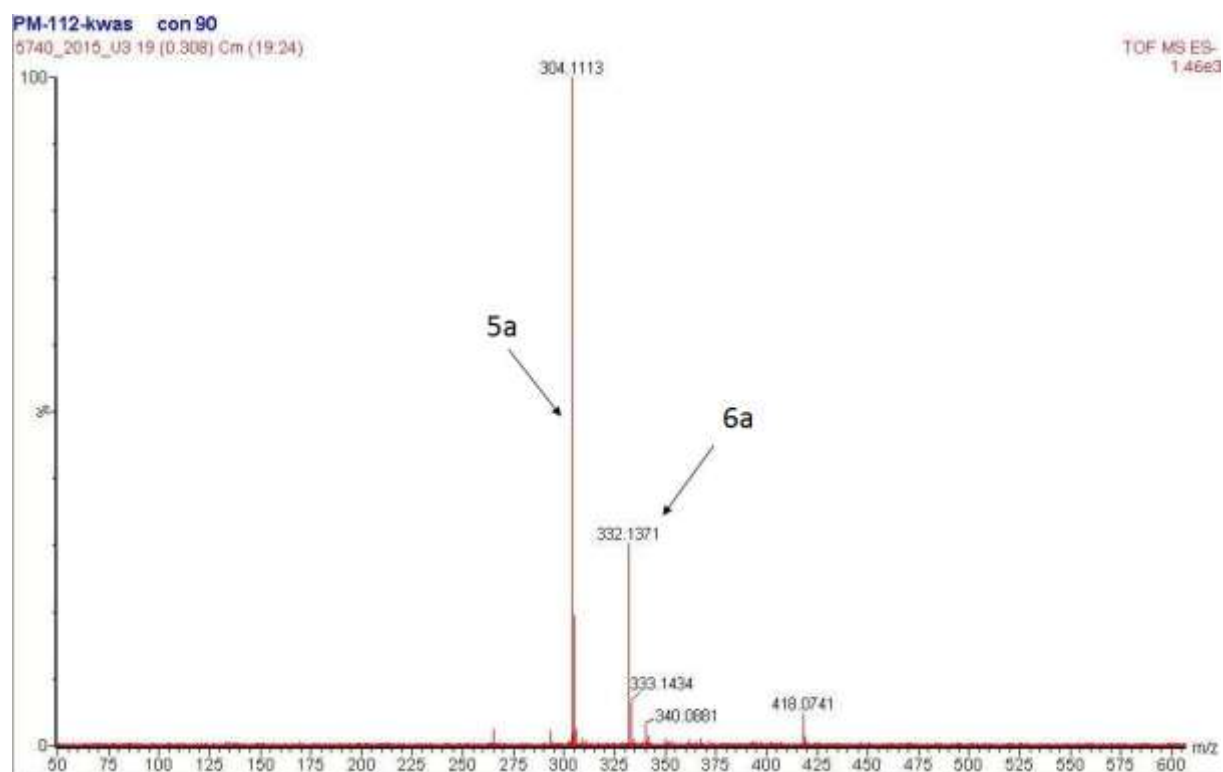

Figure S25. HRMS spectrum of mixture of compounds **5a** and **6a**

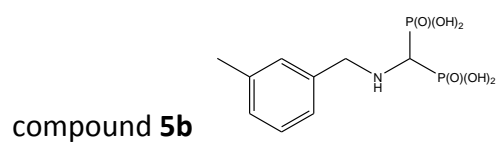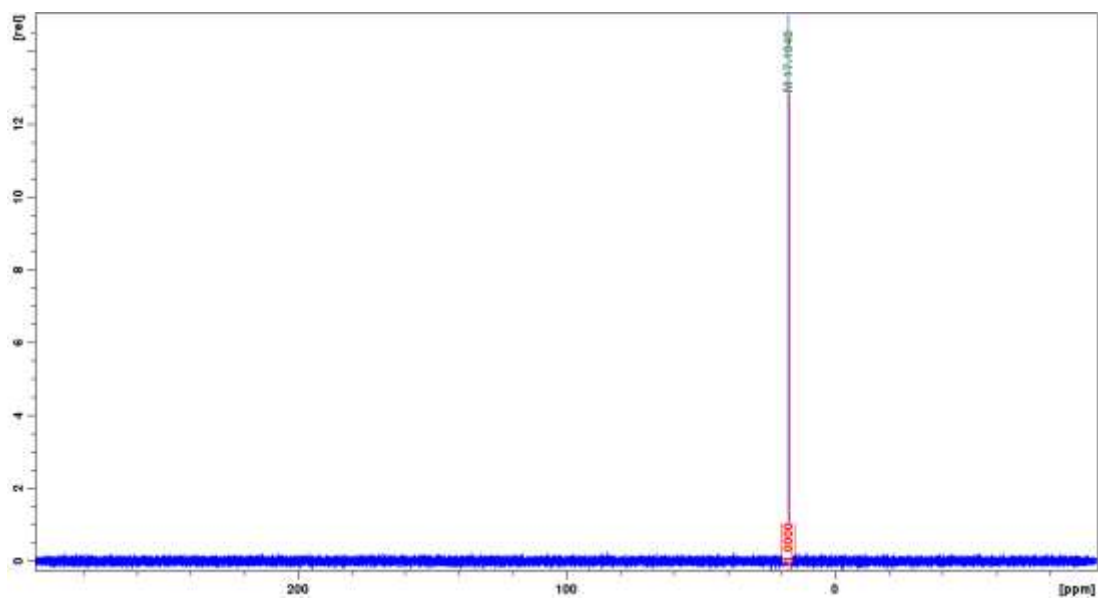

Figure S26.  $^{31}\text{P}$  NMR spectrum of compounds **5b**

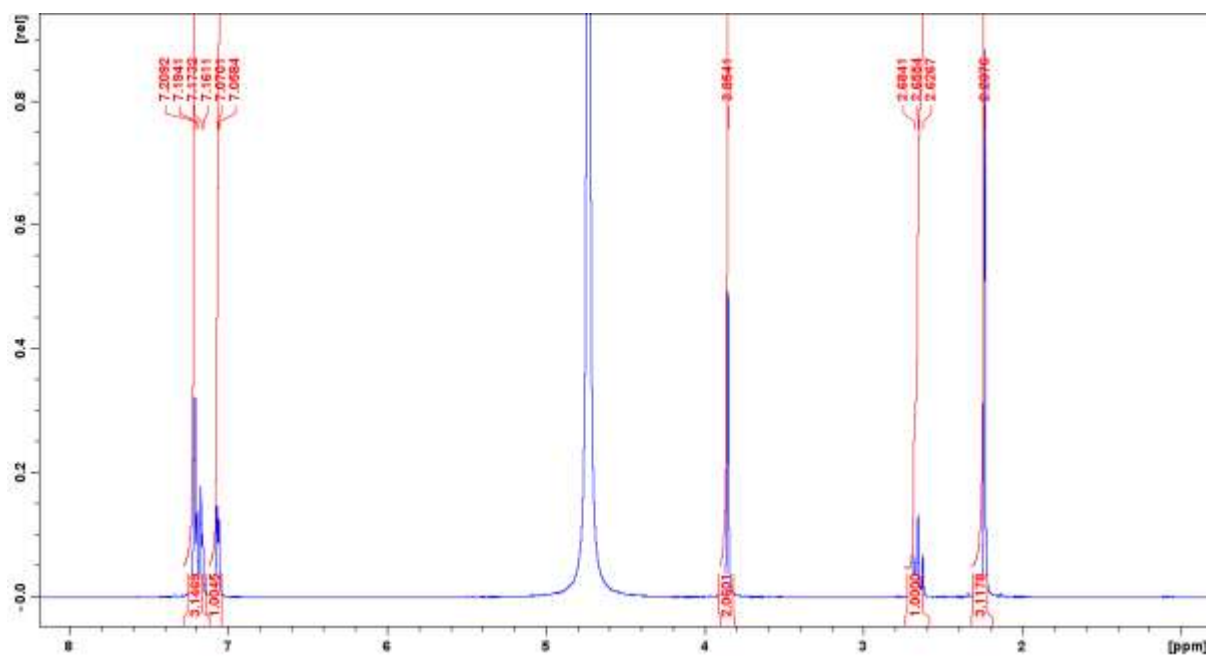

Figure S27. <sup>1</sup>H NMR spectrum of compounds **5b**

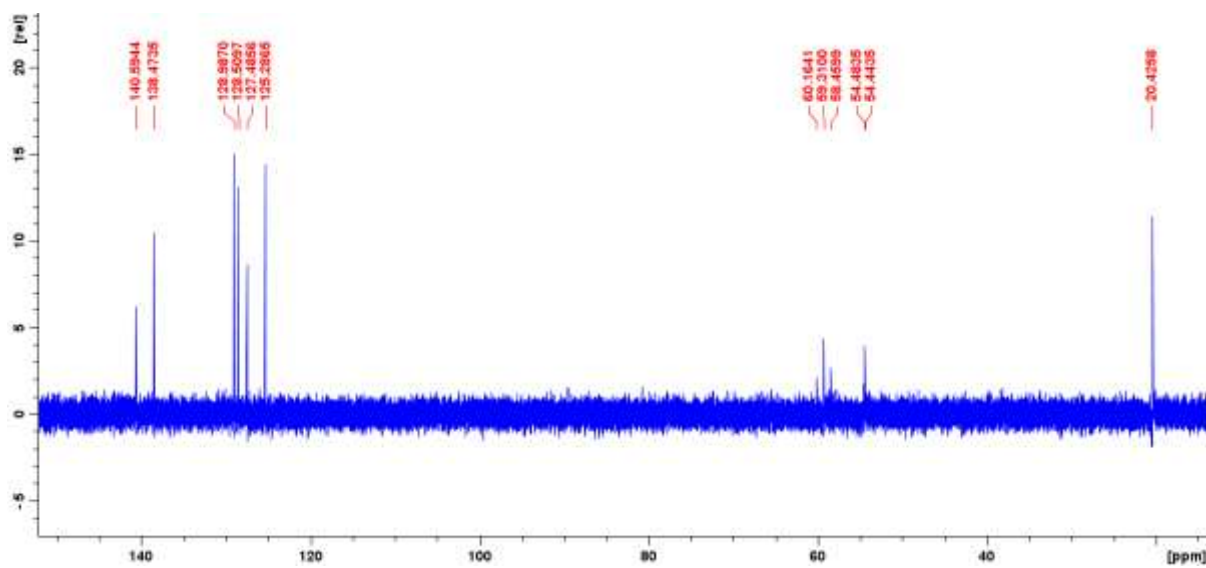

Figure S28. <sup>13</sup>C NMR spectrum of compounds **5b**

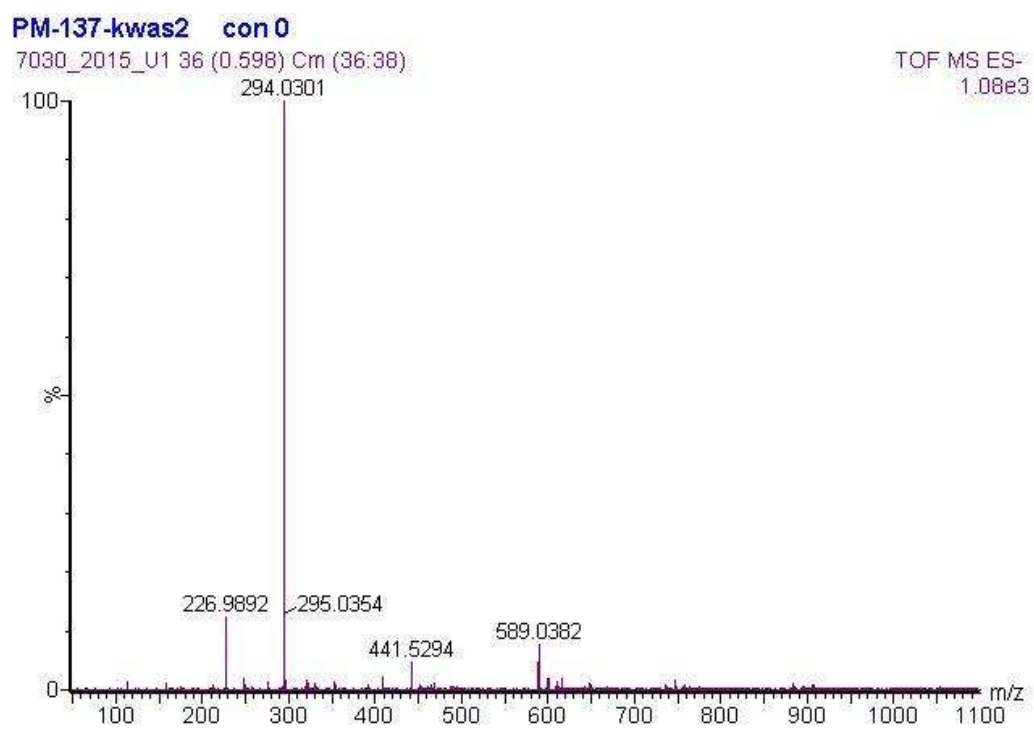

Figure S29. HRMS spectrum of compounds **5b**

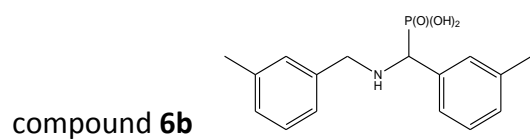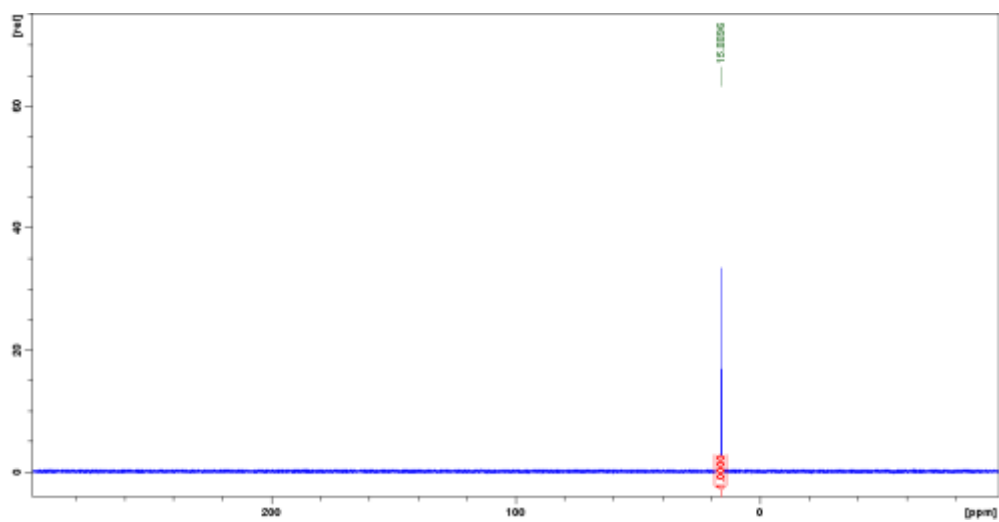

Figure S30.  $^{31}\text{P}$  NMR spectrum of compounds **6b**

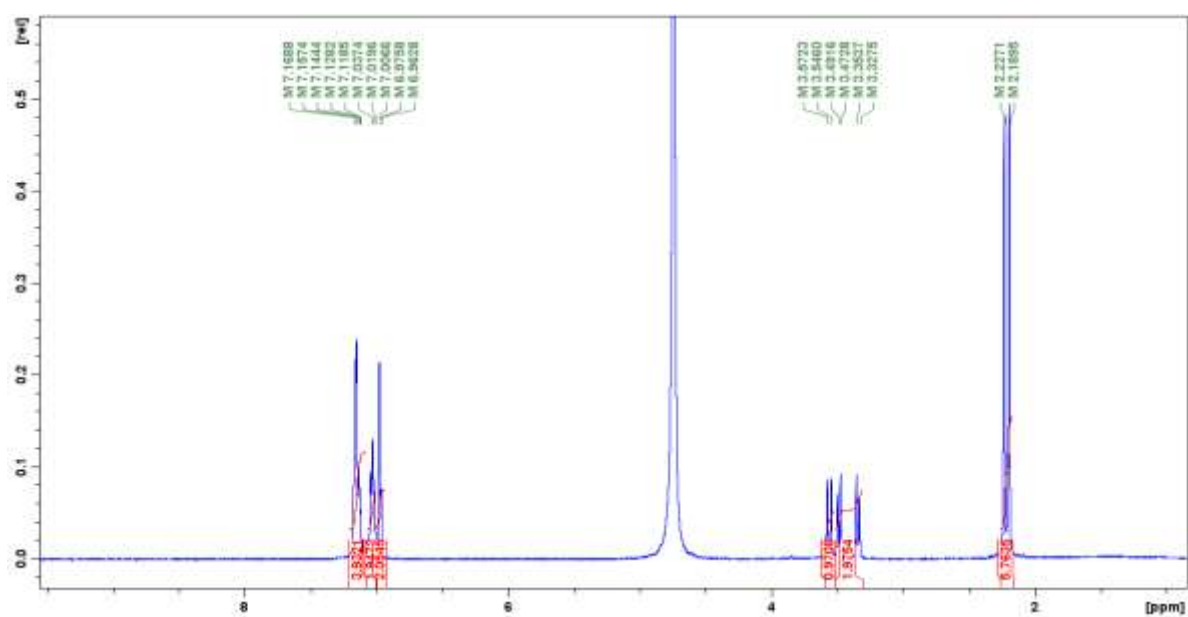

Figure S31. <sup>1</sup>H NMR spectrum of compounds **6b**

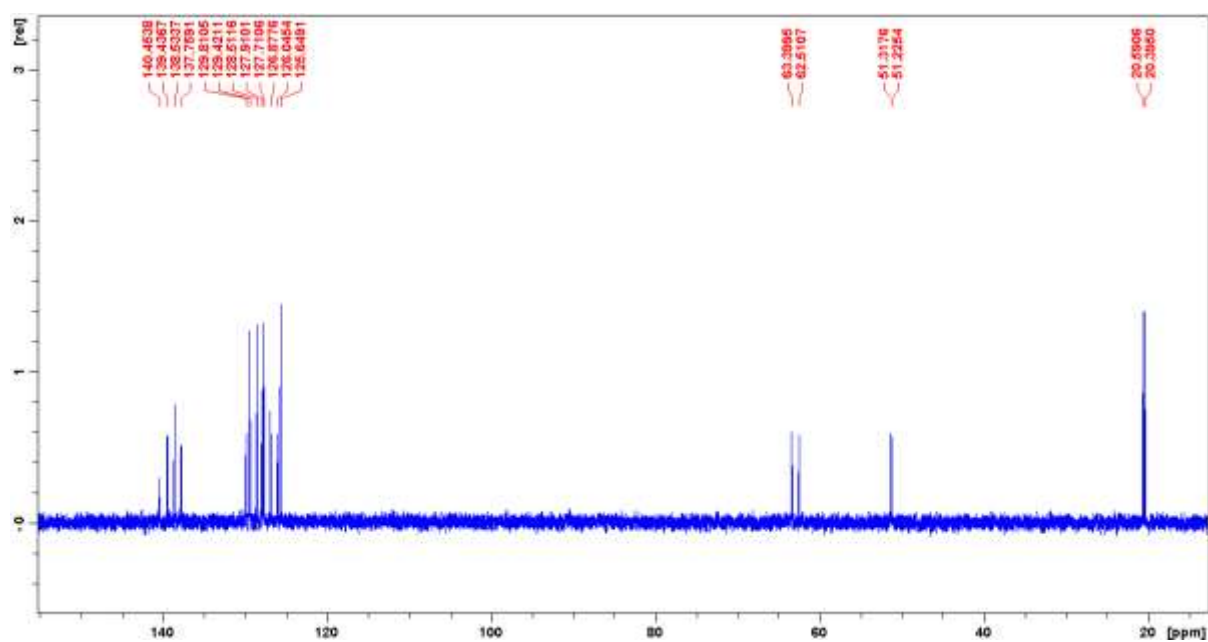

Figure S32. <sup>13</sup>C NMR spectrum of compounds **6b**



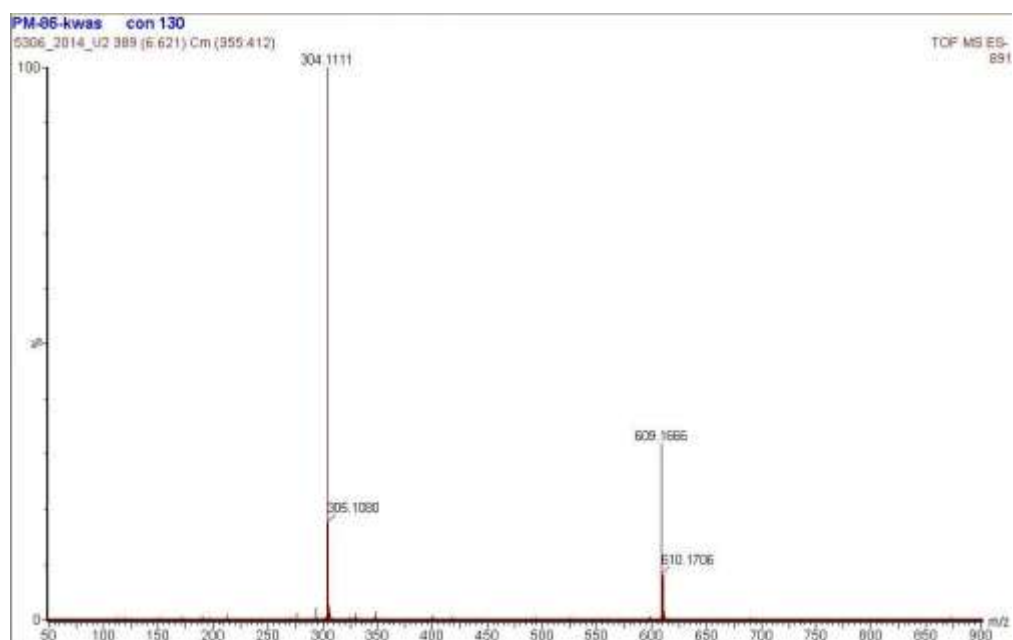

Figure S33. HRMS spectrum of compounds **6b**

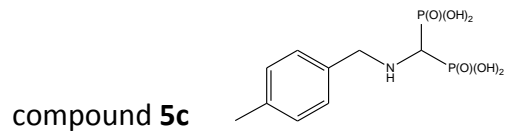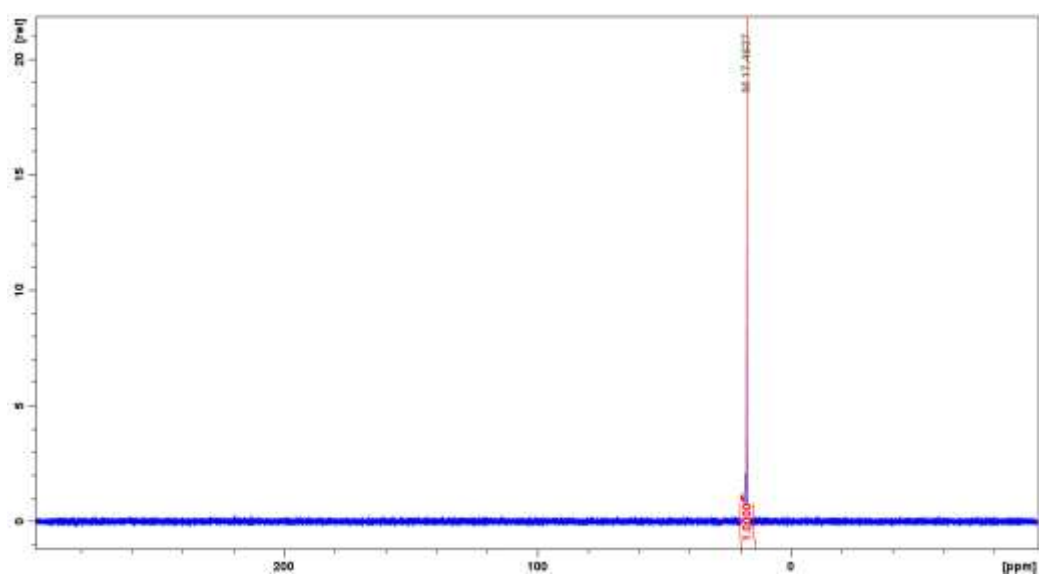

Figure S34.  $^{31}\text{P}$  NMR spectrum of compounds **5c**

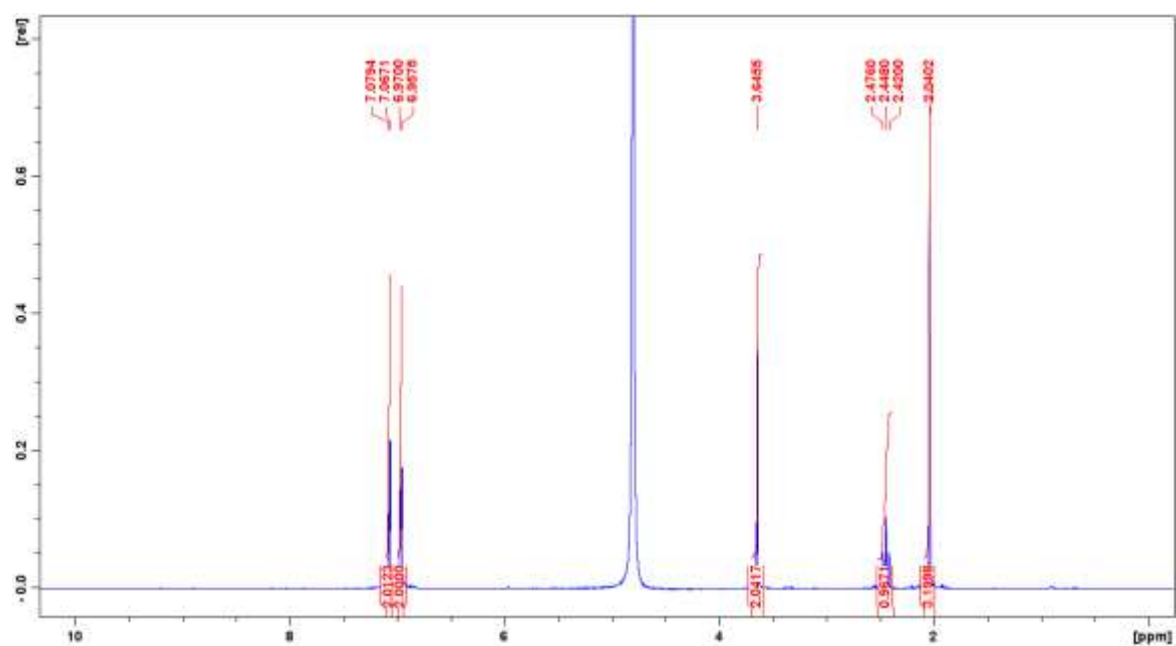

Figure S35. <sup>1</sup>H NMR spectrum of compounds **5c**

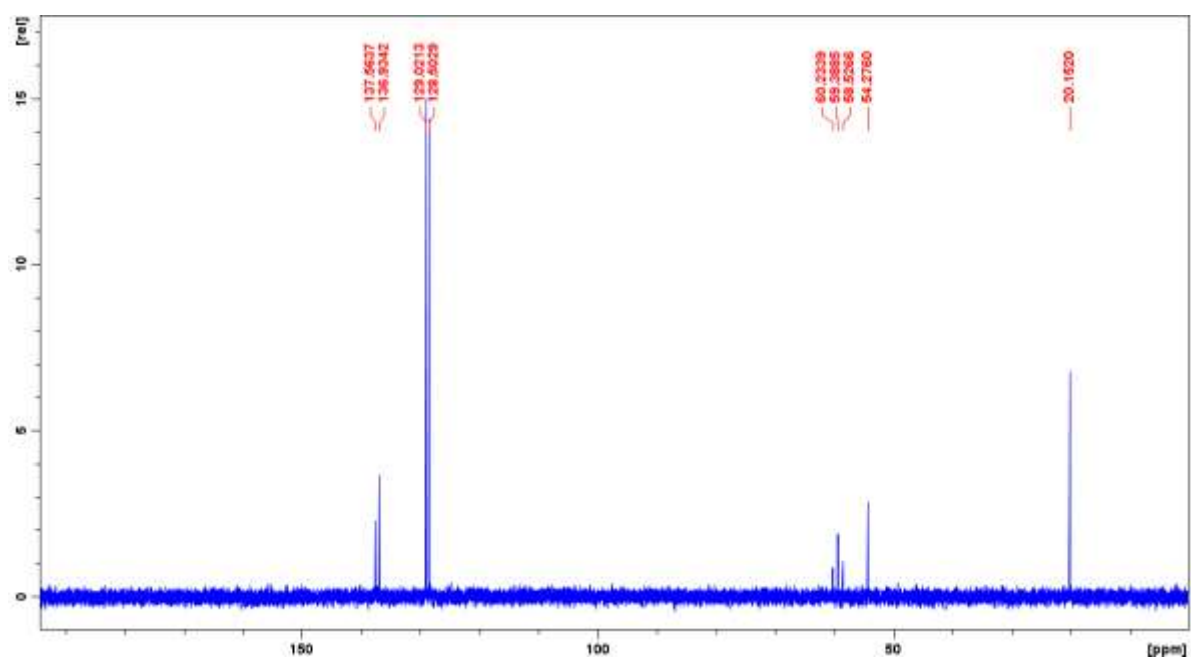

Figure S36. <sup>13</sup>C NMR spectrum of compounds **5c**

PM-136-osad con 0

6737\_2015\_U2 18 (0.289) Cm (18:23)

TOF MS ES-  
1.99e3

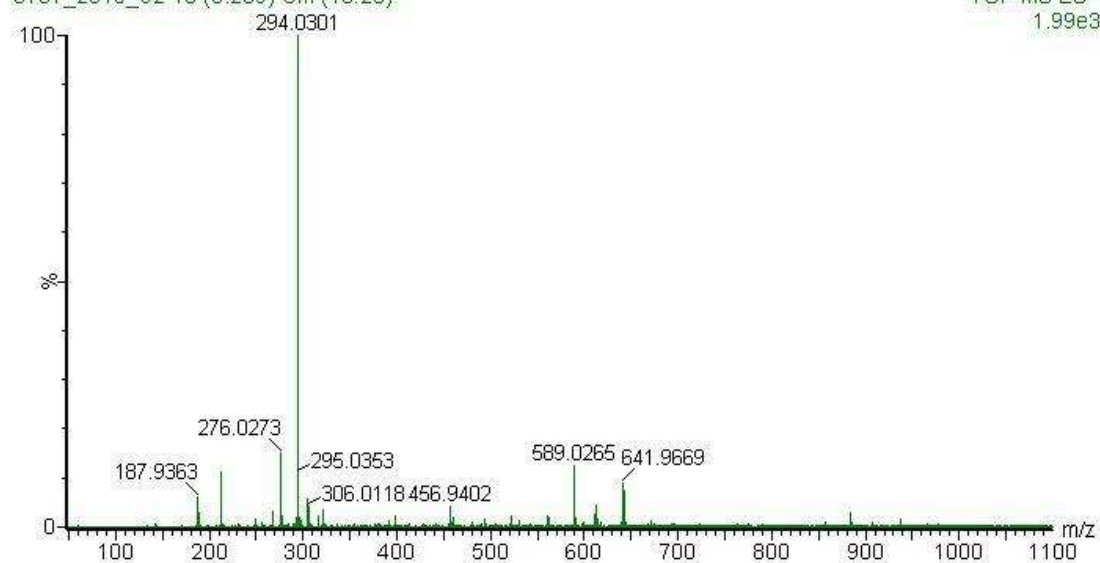

Figure S37. HRMS spectrum of compounds 5c

compound 6c

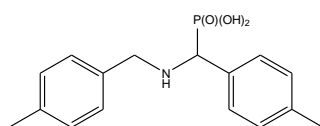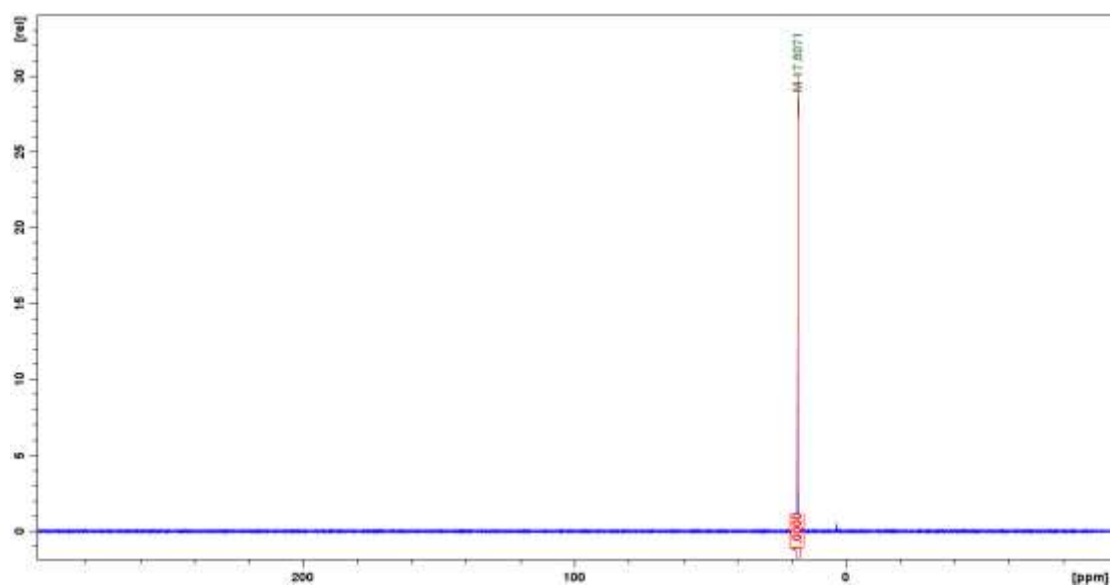

Figure S38.  $^{31}\text{P}$  NMR spectrum of compounds 6c

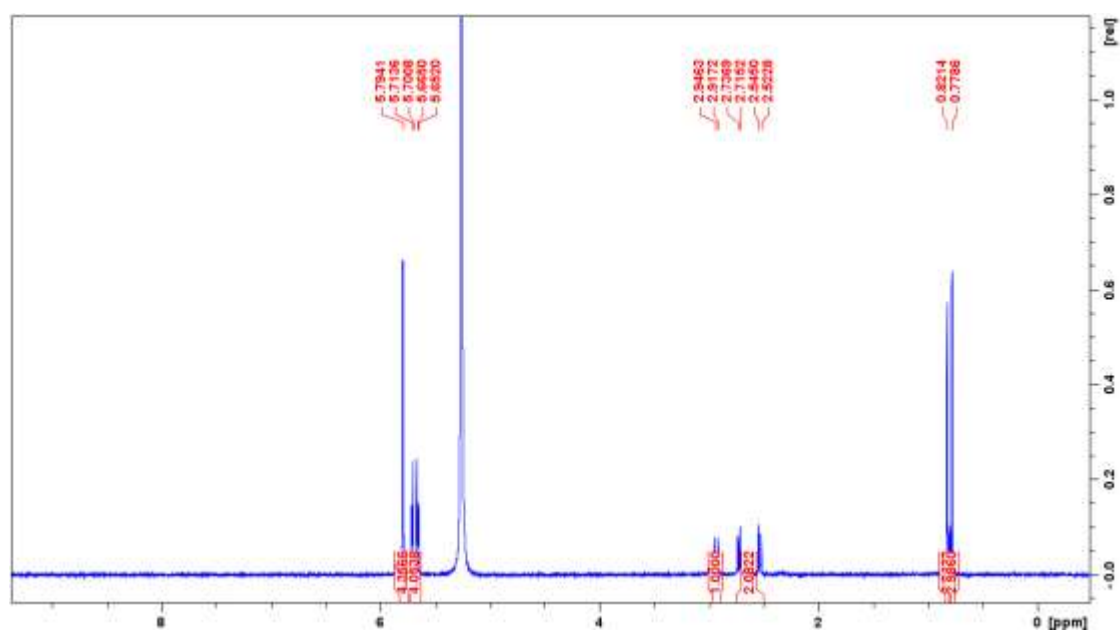

Figure S39. <sup>1</sup>H NMR spectrum of compounds 6c

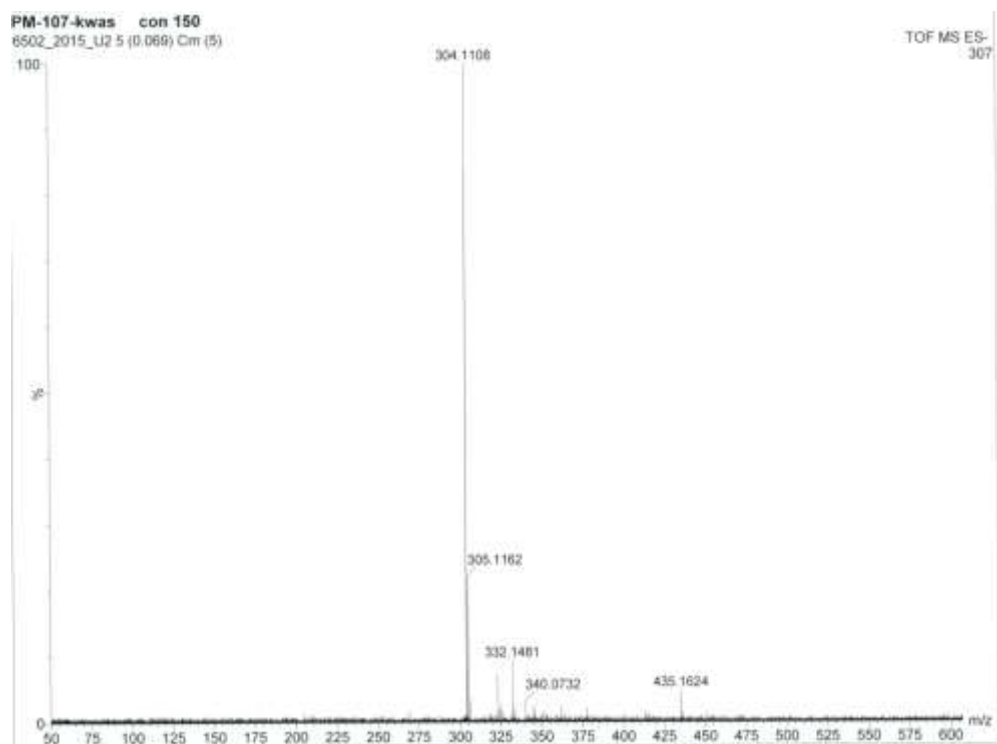

Figure S40. HRMS spectrum of compounds 6c

Mixture of **5c** and **6c**

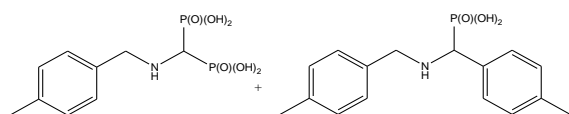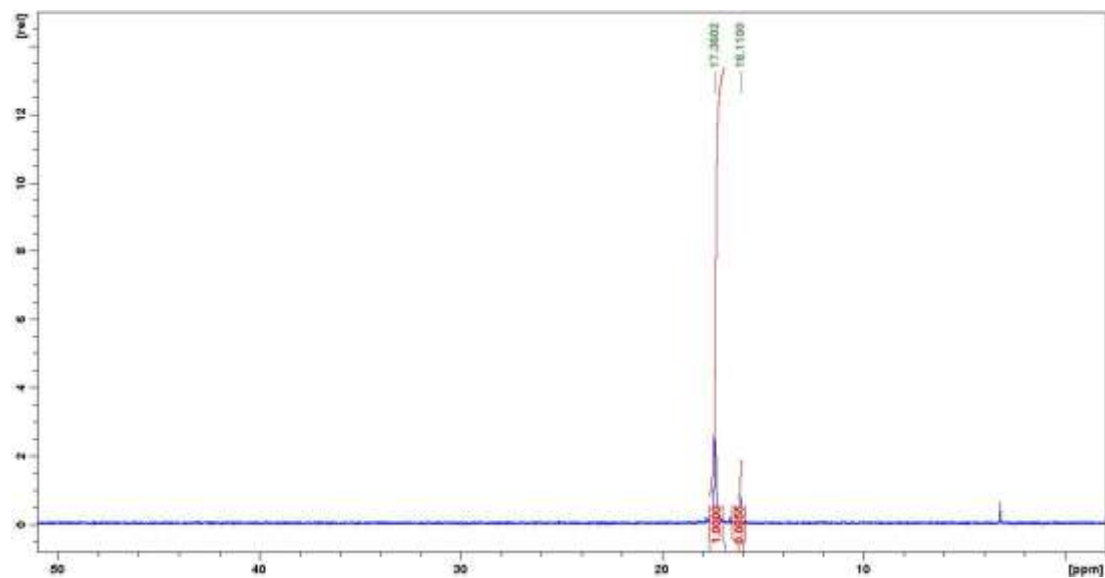

Figure S41.  $^{31}\text{P}$  NMR spectrum of mixture of compounds **5c** and **6c**

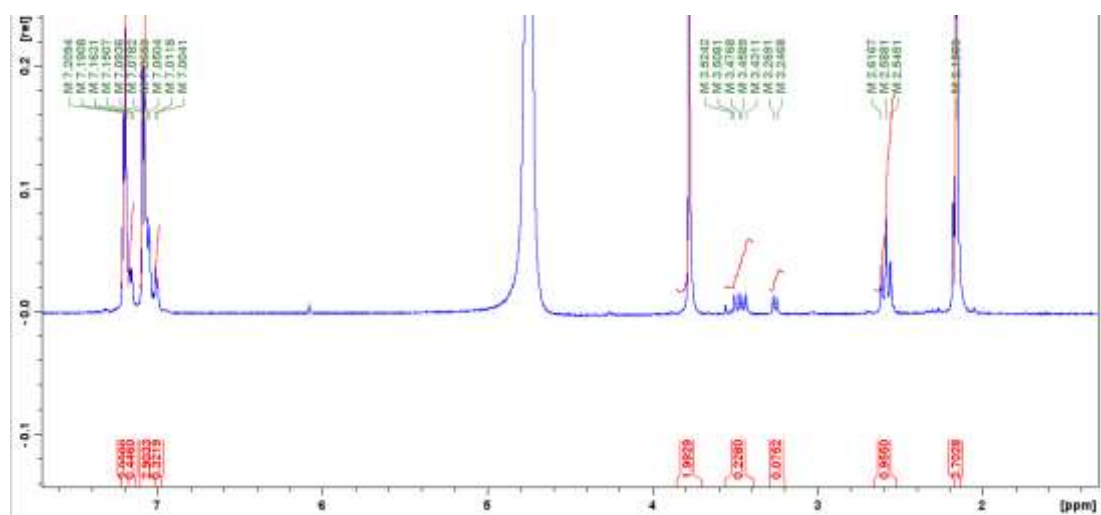

Figure S42.  $^1\text{H}$  NMR spectrum of mixture of compounds **5c** and **6c**

compound **6d**

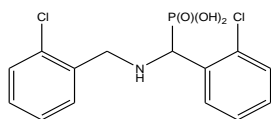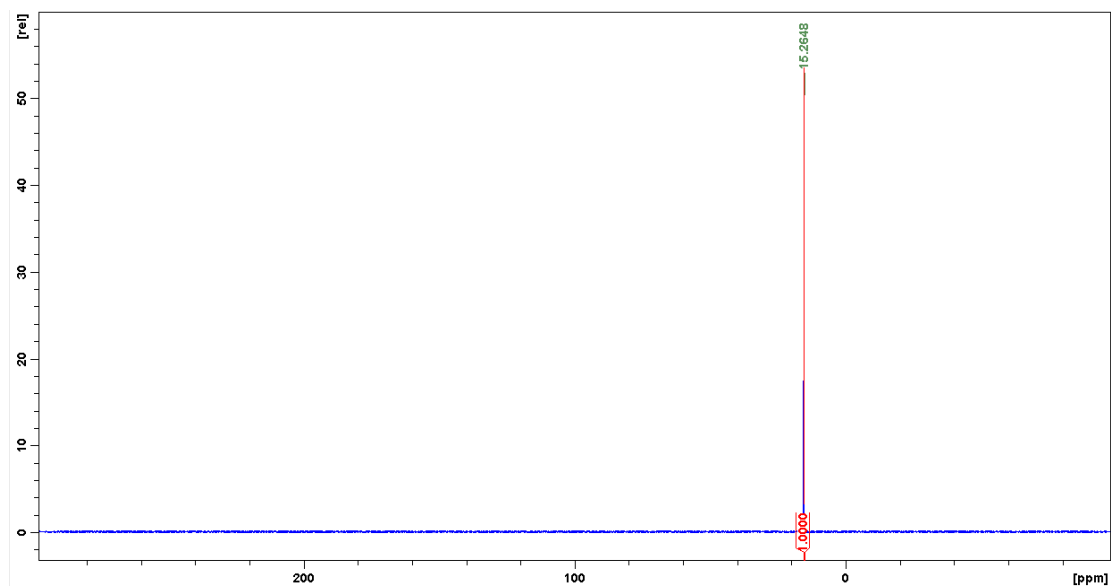

Figure S43.  $^{31}\text{P}$  NMR spectrum of compounds **6d**

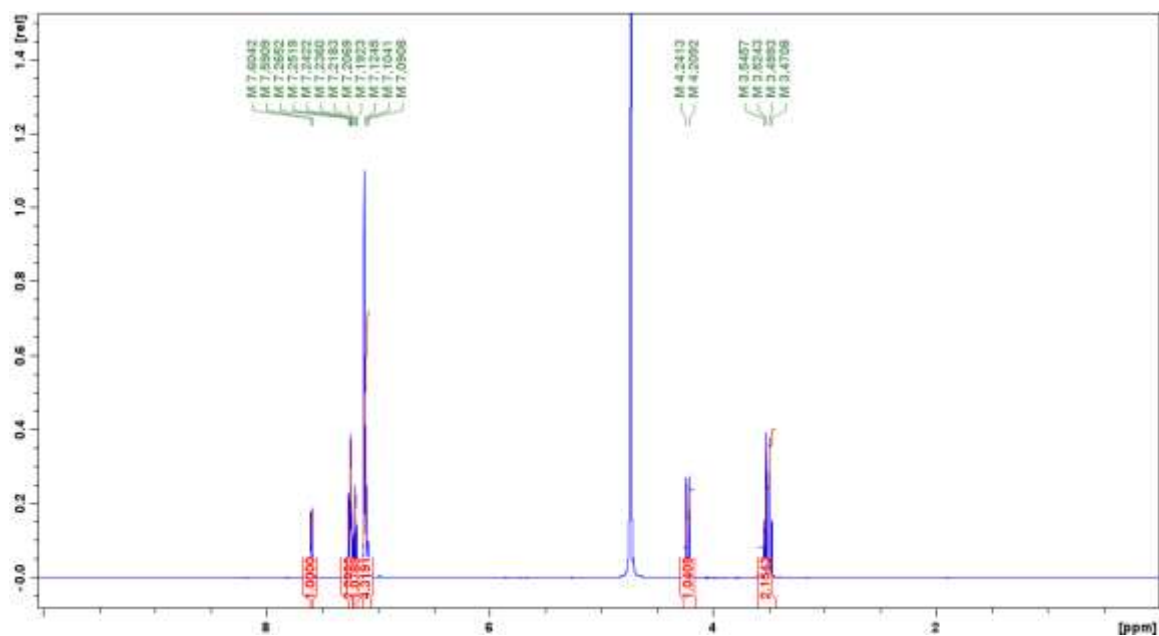

Figure S44.  $^1\text{H}$  NMR spectrum of compounds **6d**



compound **6e**

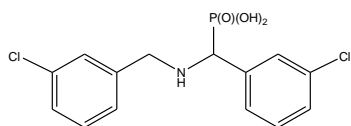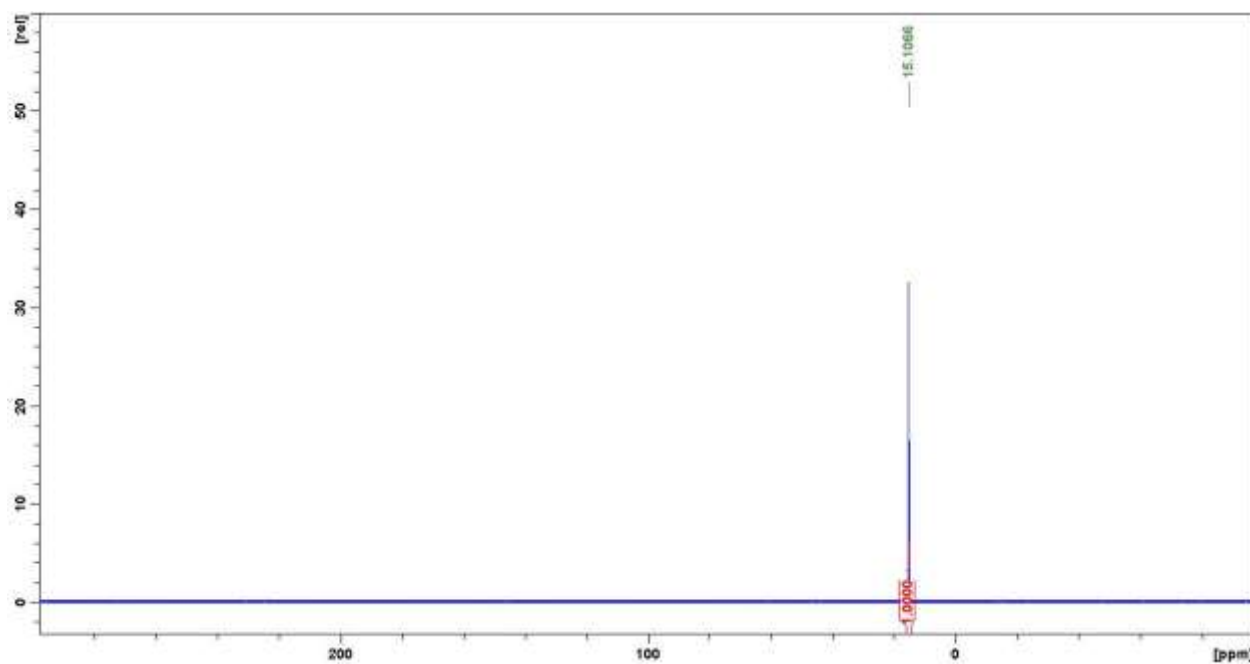

Figure S47.  $^{31}\text{P}$  NMR spectrum of compounds **6e**

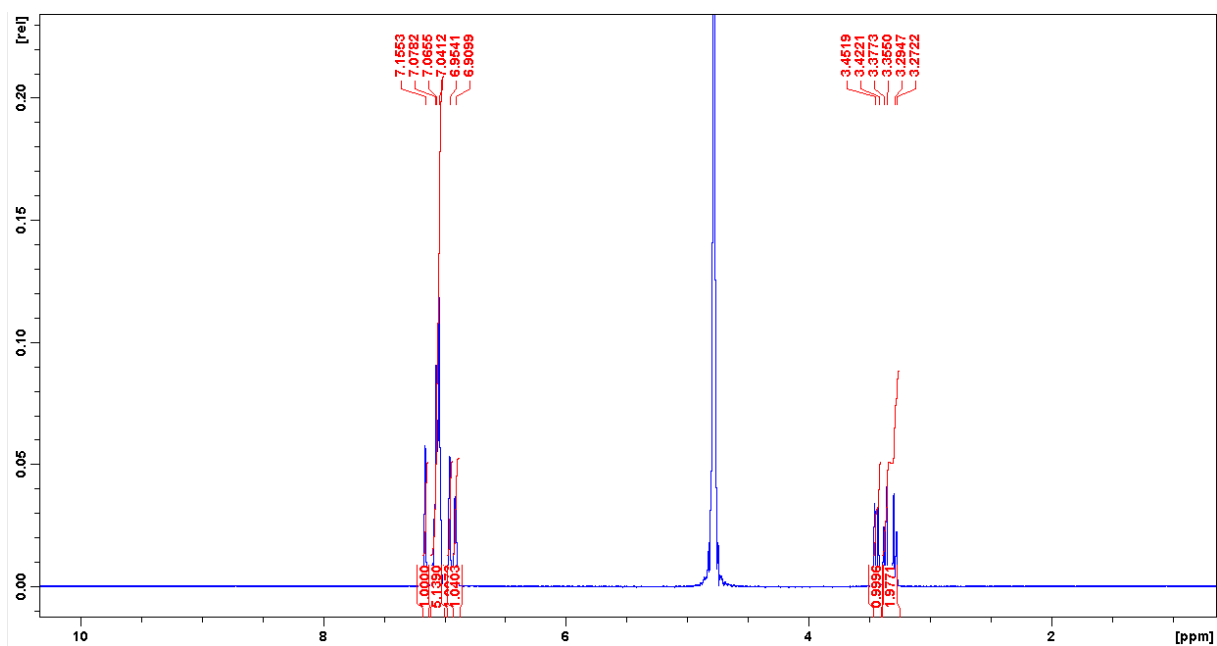

Figure S48.  $^1\text{H}$  NMR spectrum of compounds **6e**



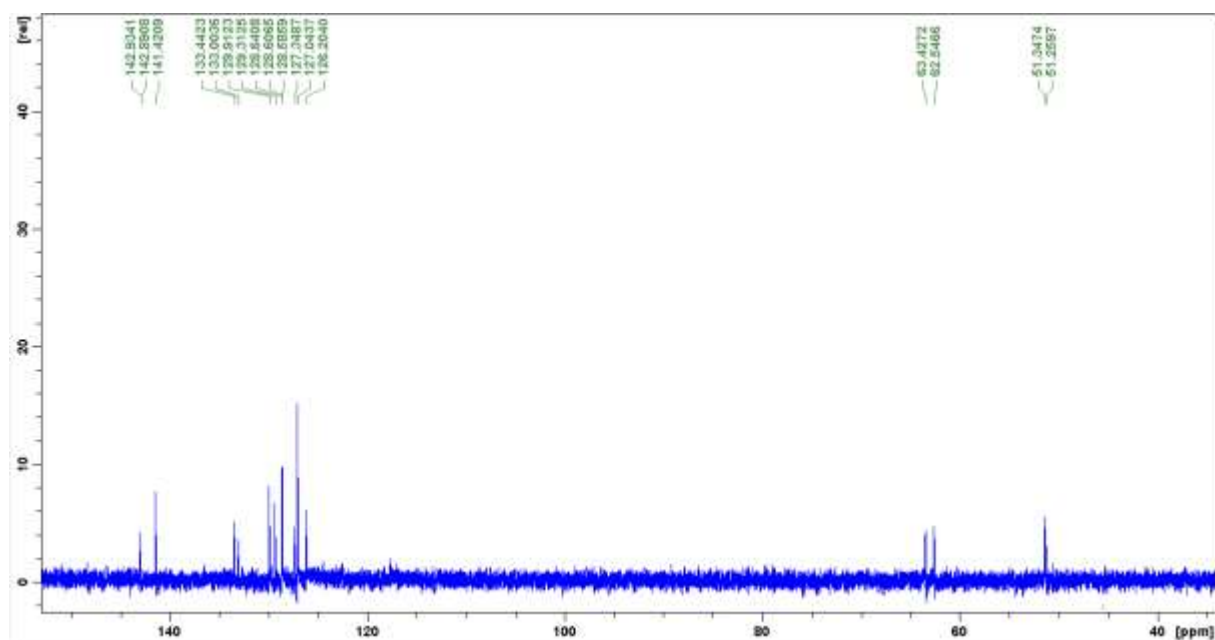

Figure S49. <sup>13</sup>C NMR spectrum of compounds **6e**

PM-79-kwas con 0

7109\_2015\_U2 20 (0.325) Cm (18.23)

TOF MS ES-  
1.44e3

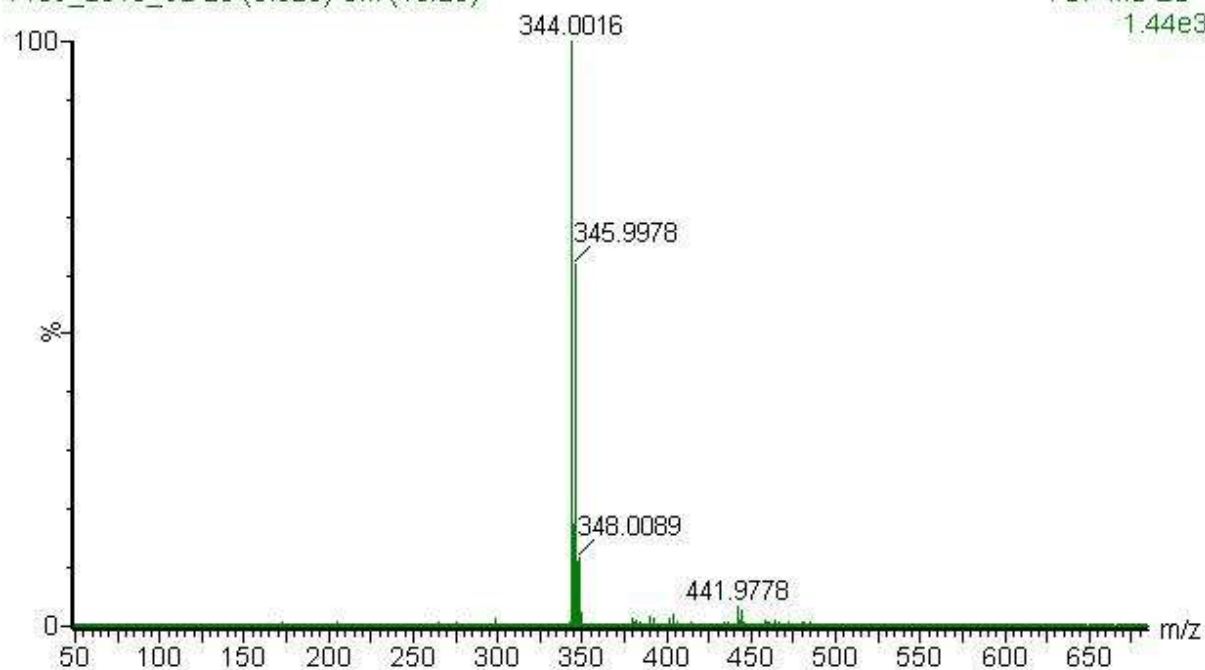

Figure S50. HRMS spectrum of compounds **6e**

mixture of compounds **5g**+**6g**

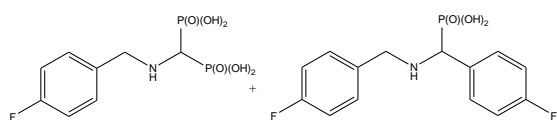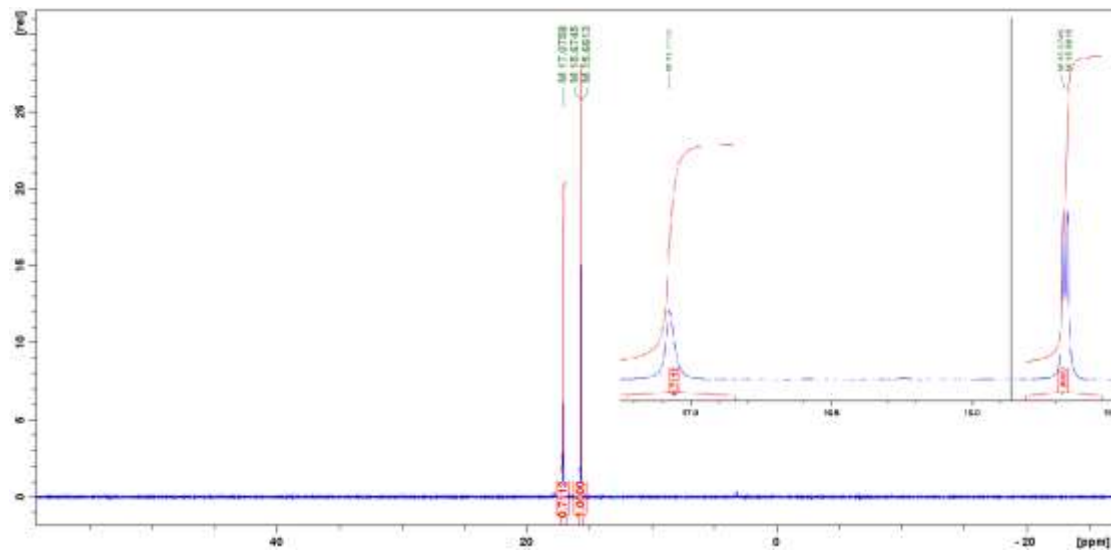

Figure S51. <sup>31</sup>P NMR spectrum of mixture of compounds **5g** and **6g**

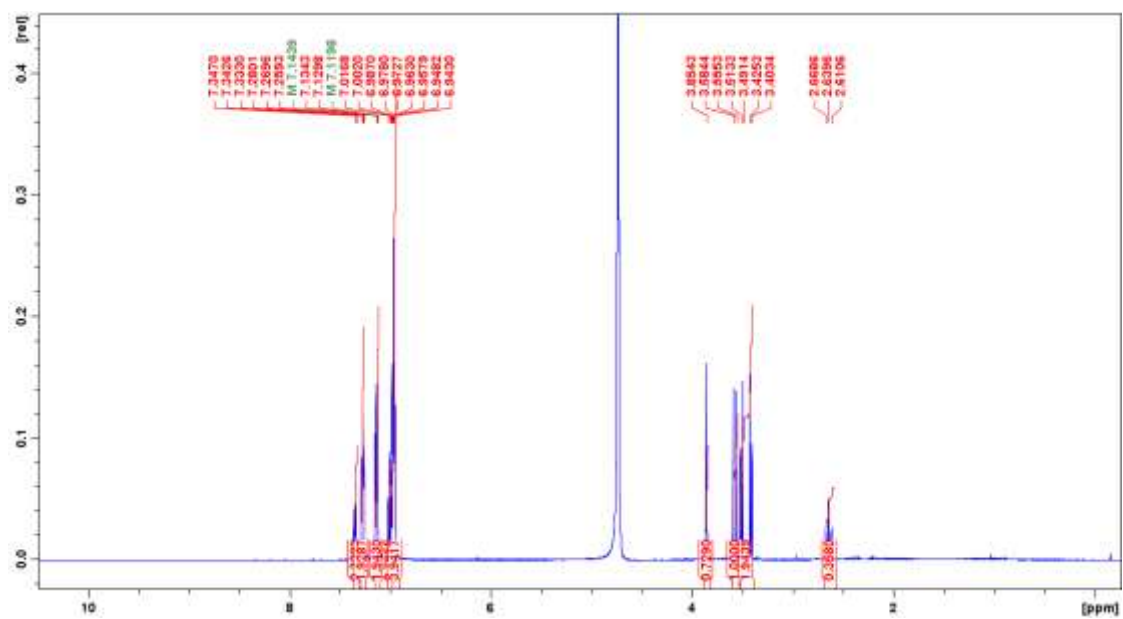

Figure S52. <sup>1</sup>H NMR spectrum of mixture of compounds **5g** and **6g**

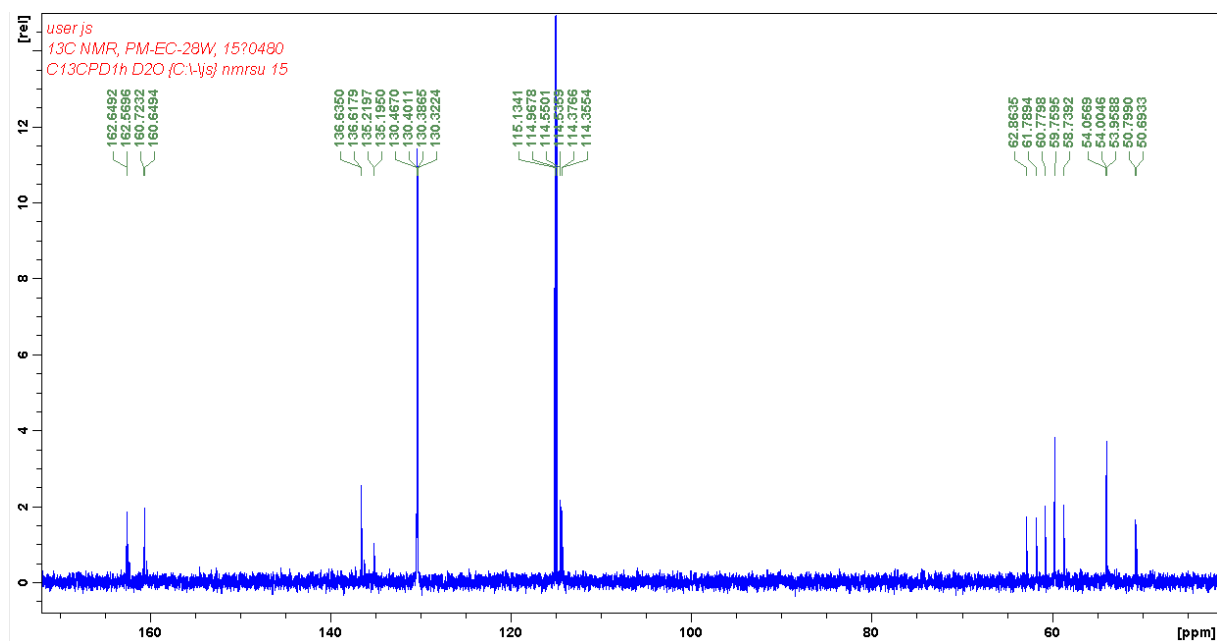

Figure S53. <sup>13</sup>C NMR spectrum of mixture of compounds **5g** and **6g**

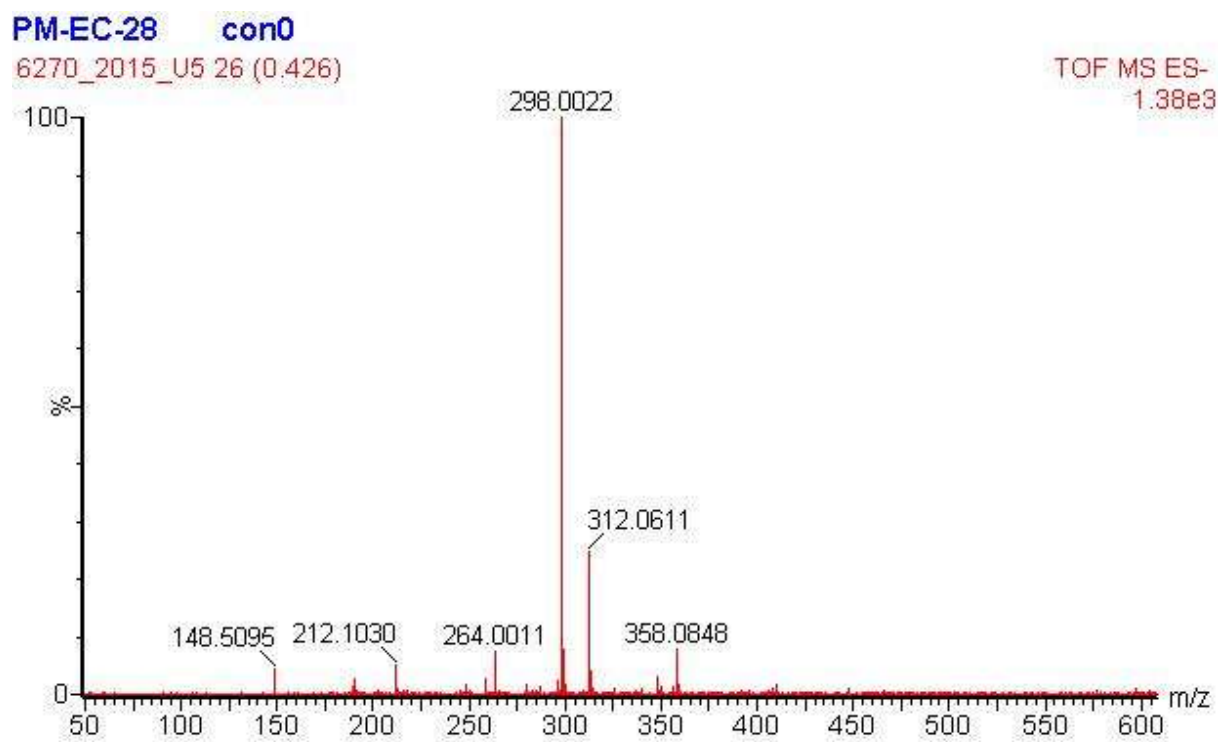

Figure S54. HRMS spectrum of mixture of compounds **5g** and **6g**

compound **5h**

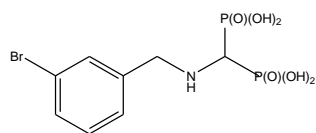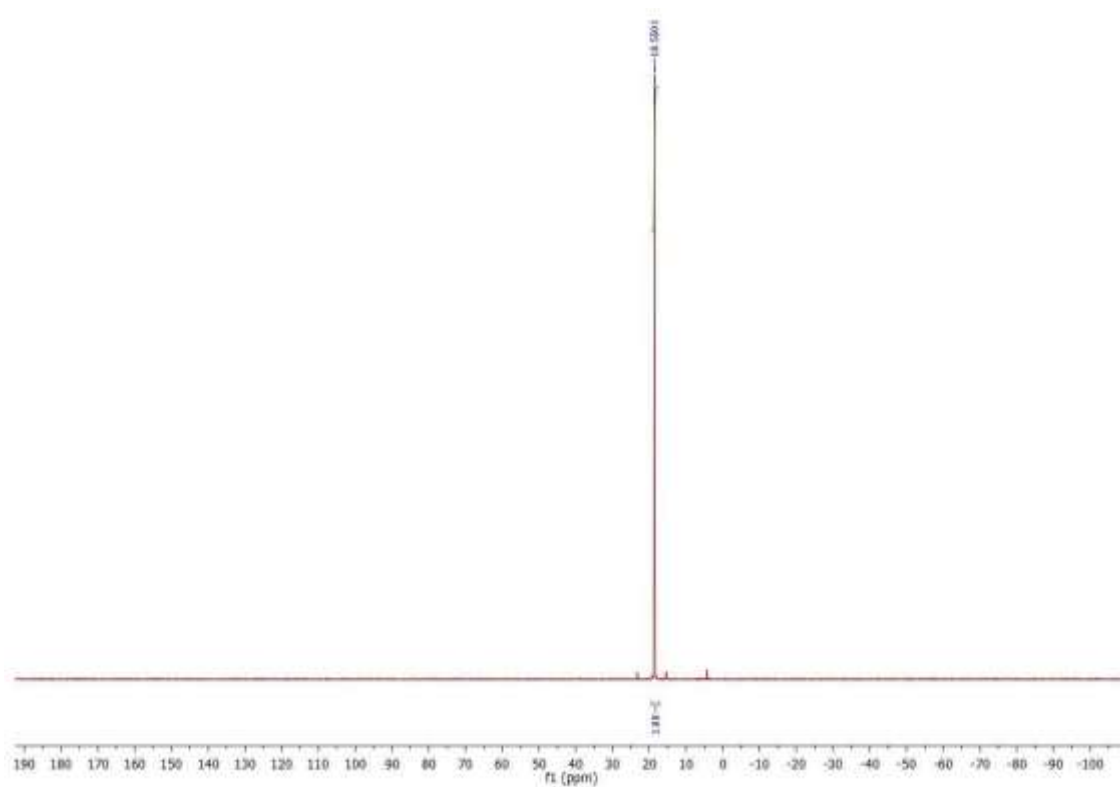

Figure S55.  $^{31}\text{P}$  NMR spectrum of compound **5h**

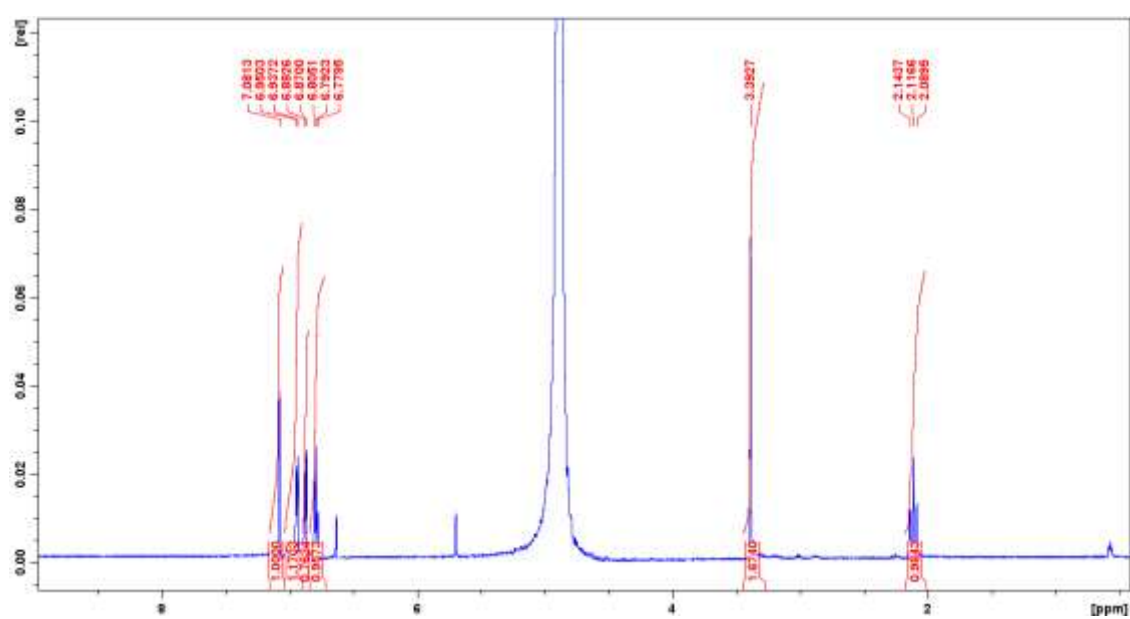

Figure S56.  $^1\text{H}$  NMR spectrum of compound **5h**

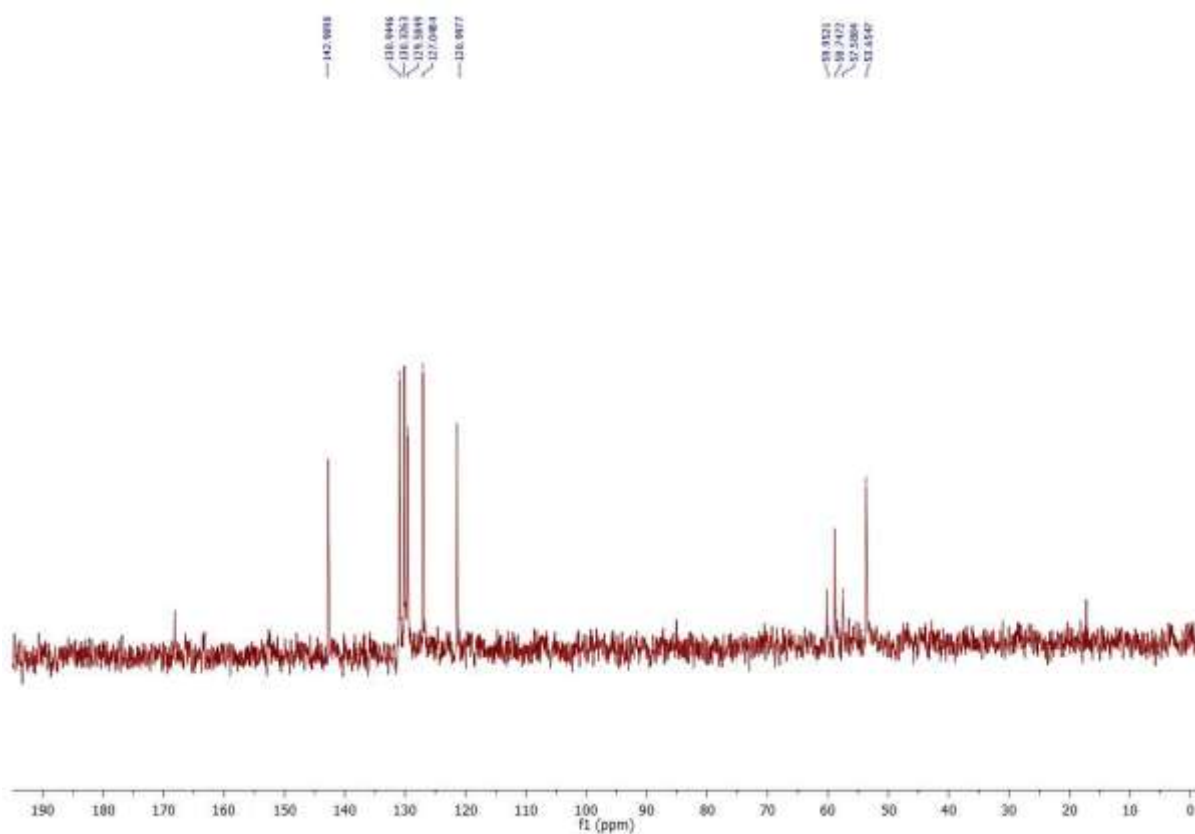

Figure S57.  $^{13}\text{C}$  NMR spectrum of compound **5h**

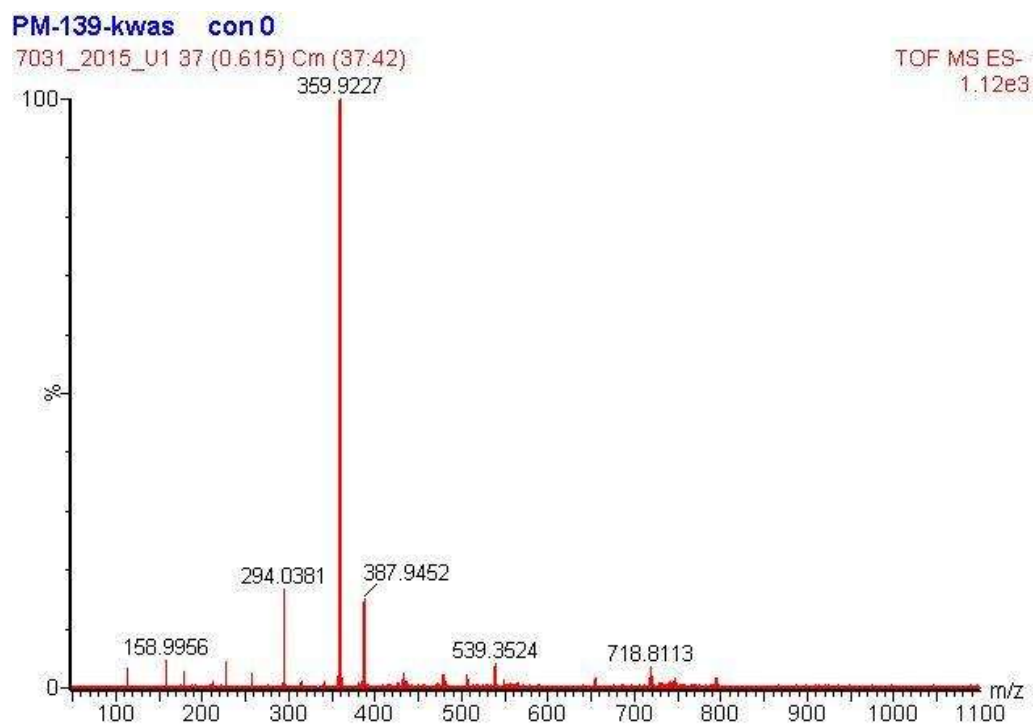

Figure S58. HRMS spectrum of compound **5h**

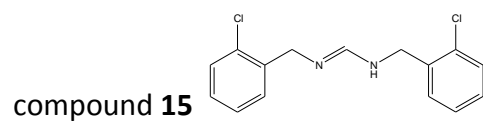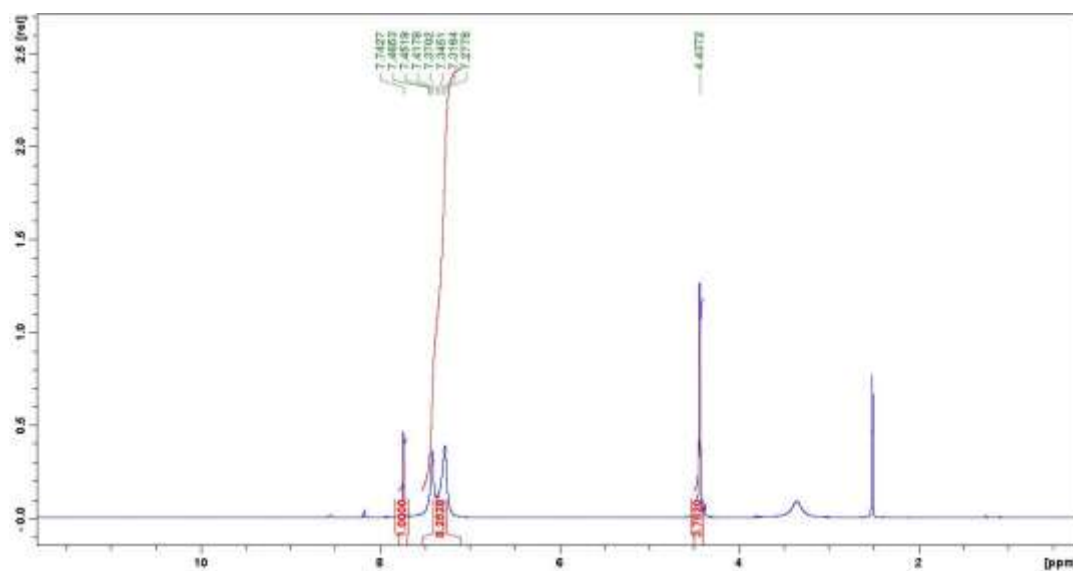

Figure S59.  $^1\text{H}$  NMR spectrum of compound **15**

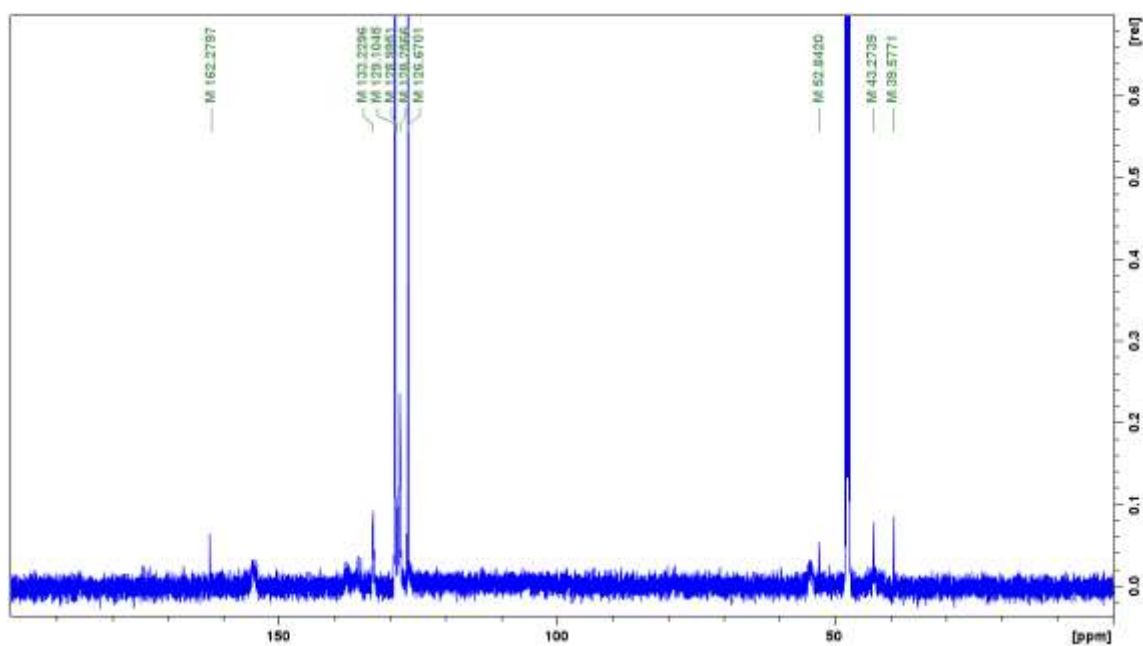

Figure S60.  $^{13}\text{C}$  NMR spectrum of compound **15**

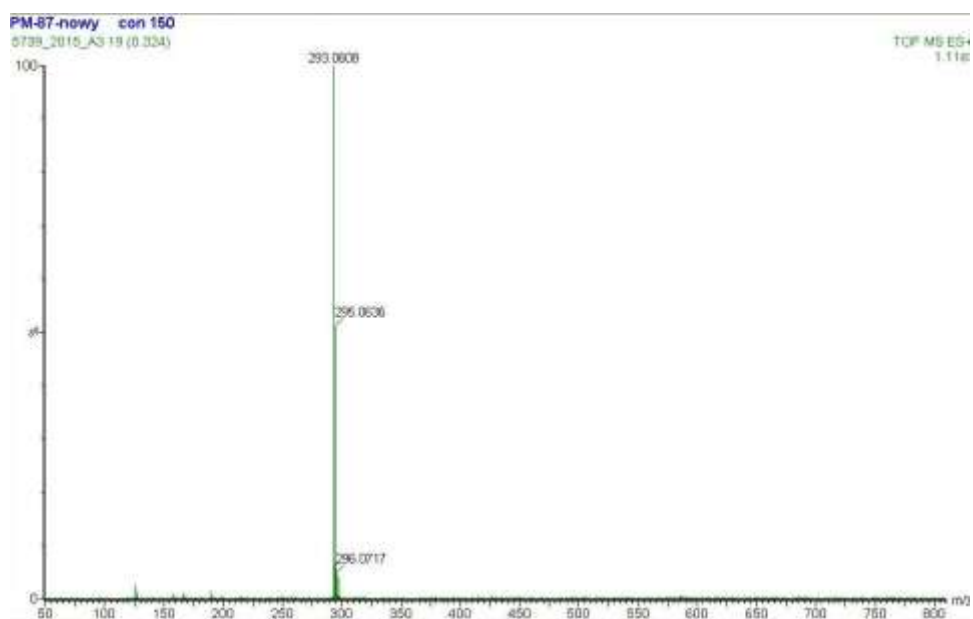

*mixture of compounds 6d and 16*

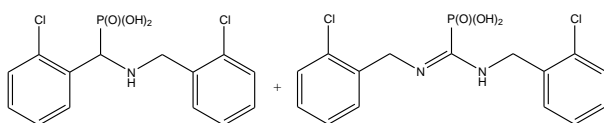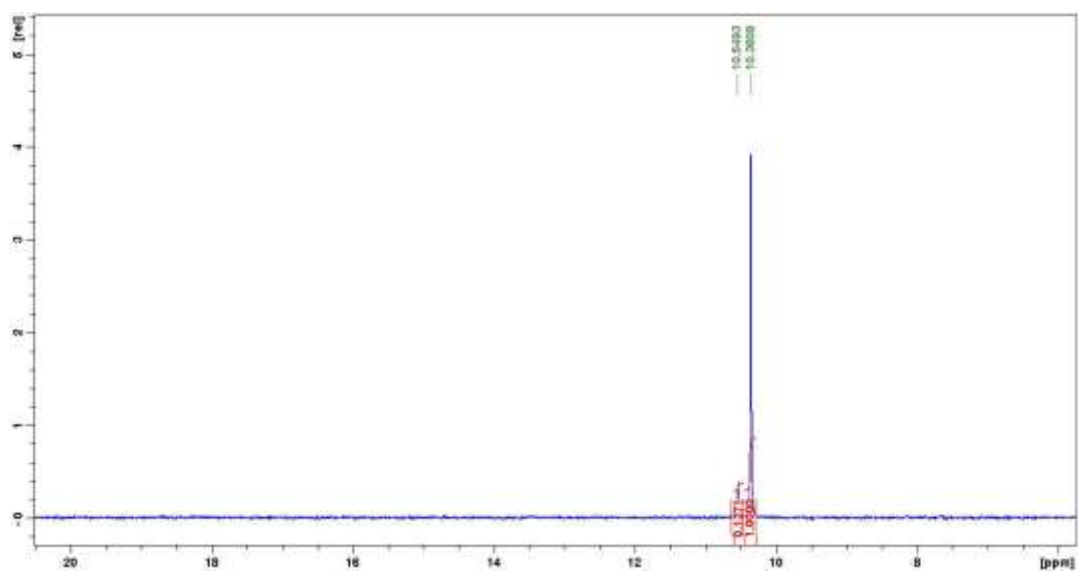





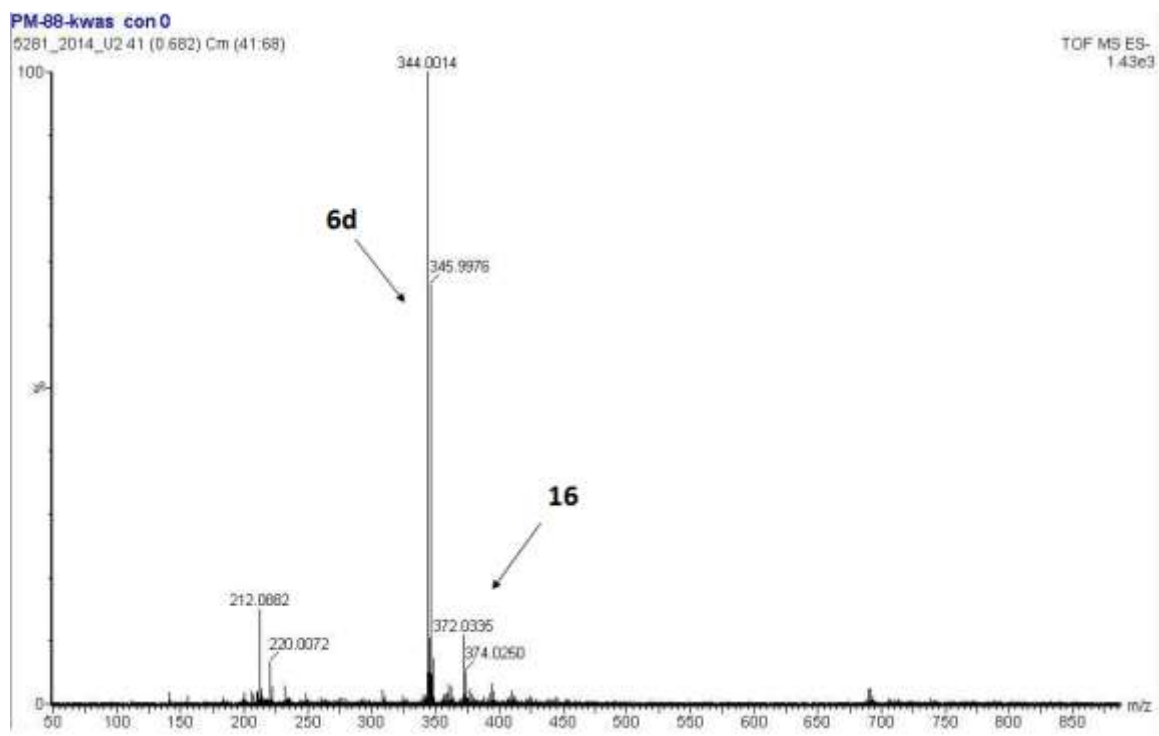

S65. HRMS spectrum of *mixture of compounds 6d and 16*

compound **8**

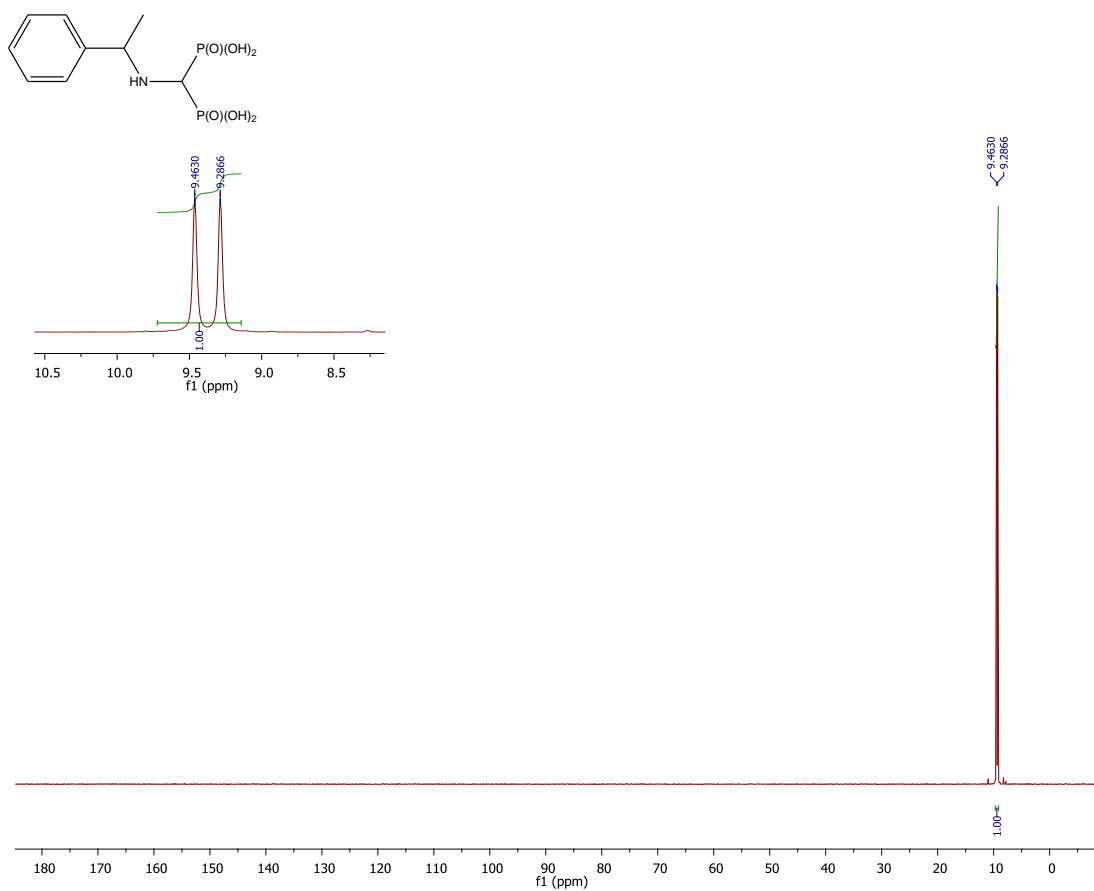

Figure S66.  $^{31}\text{P}$  NMR spectrum of compound **8**

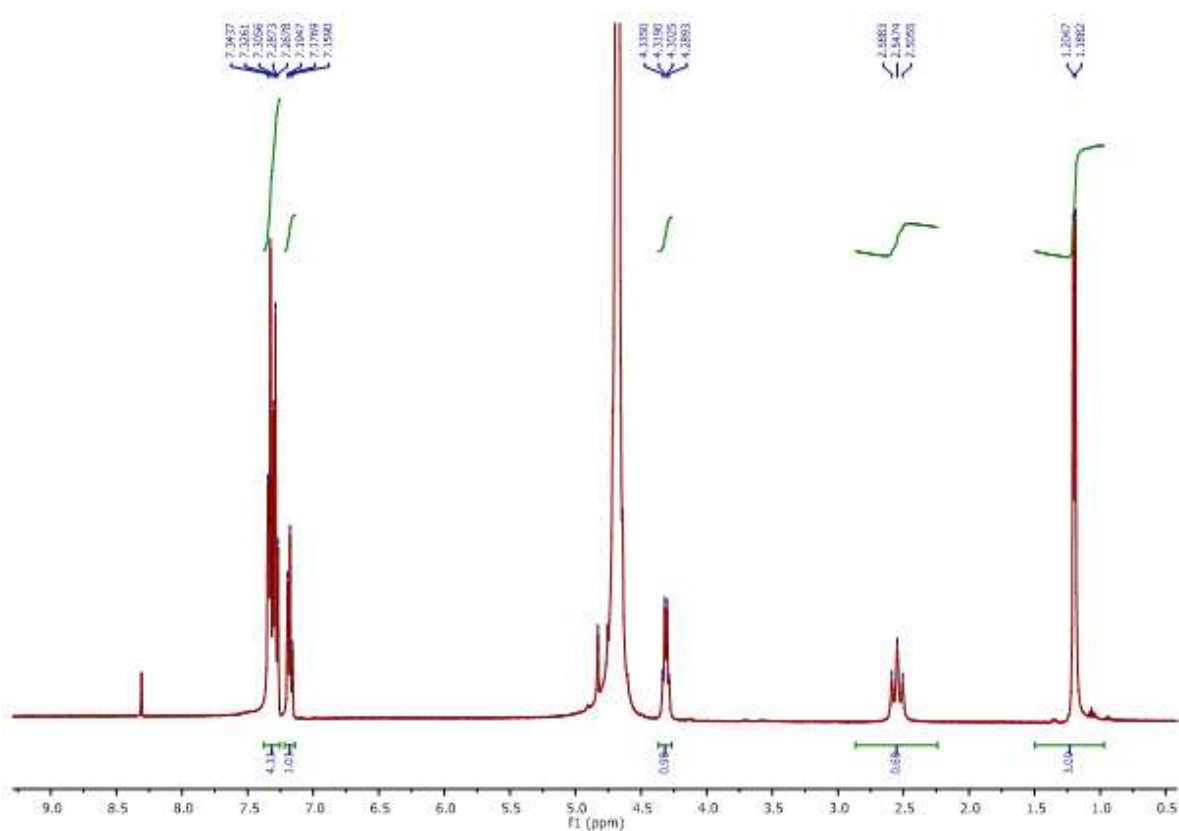

Figure S67. <sup>1</sup>H NMR spectrum of compound **8**

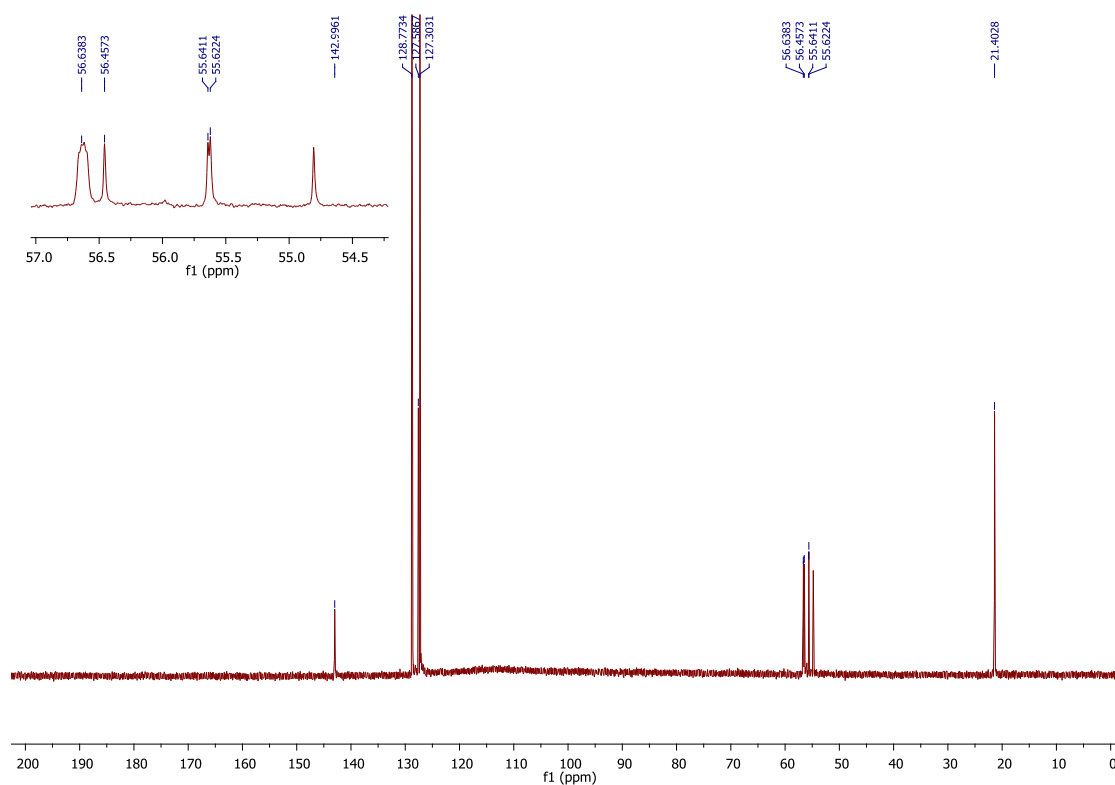

Figure S68. <sup>13</sup>C NMR spectrum of compound **8**

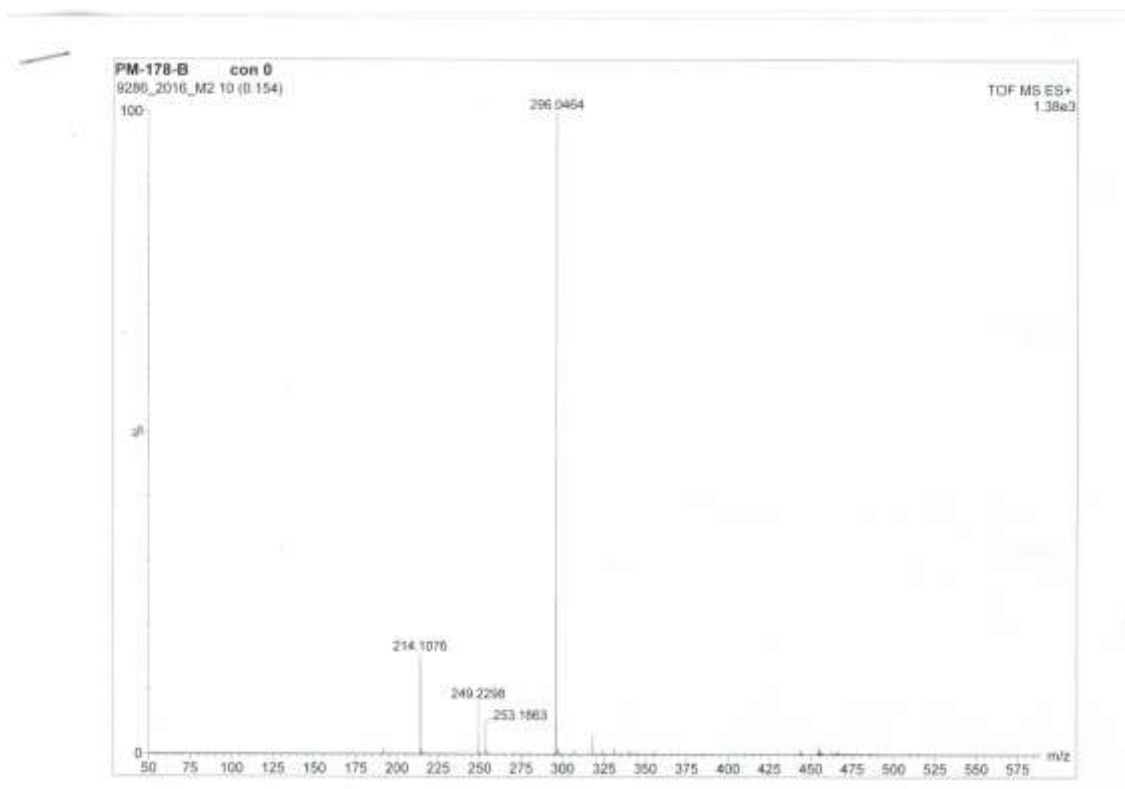

**Figure S69.** HRMS spectrum of compound **8**

*mixture of compounds 9a and 10*

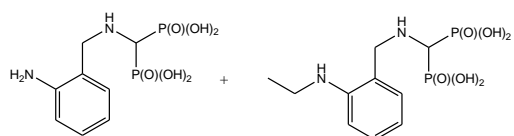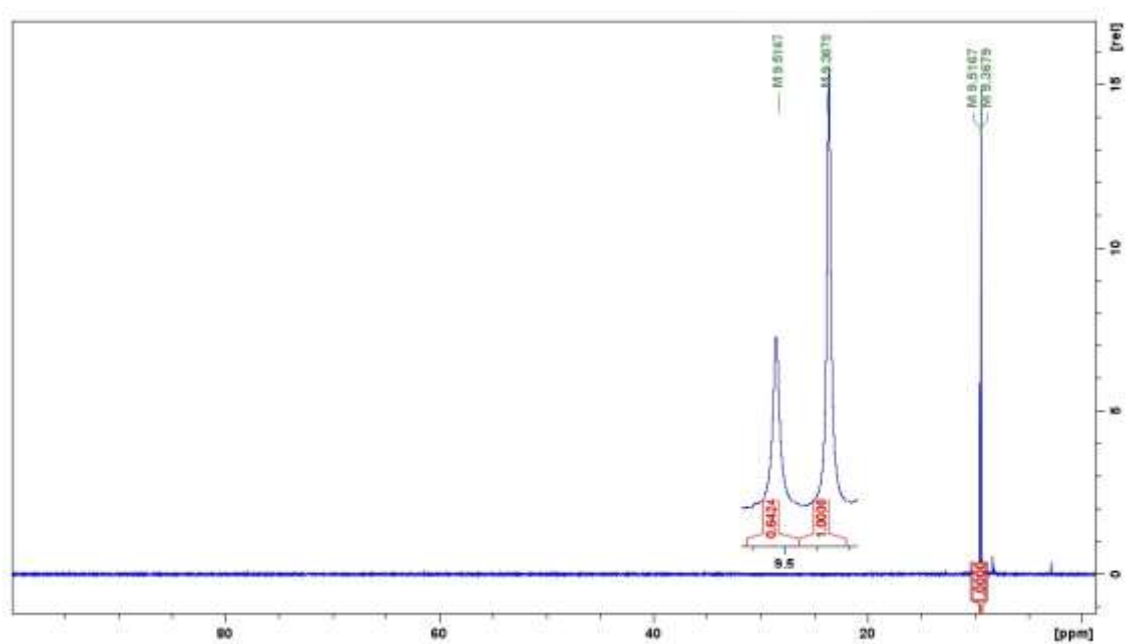

**Figure S70.**  $^{31}\text{P}$  NMR spectrum of mixture of compounds **9a** and **10**

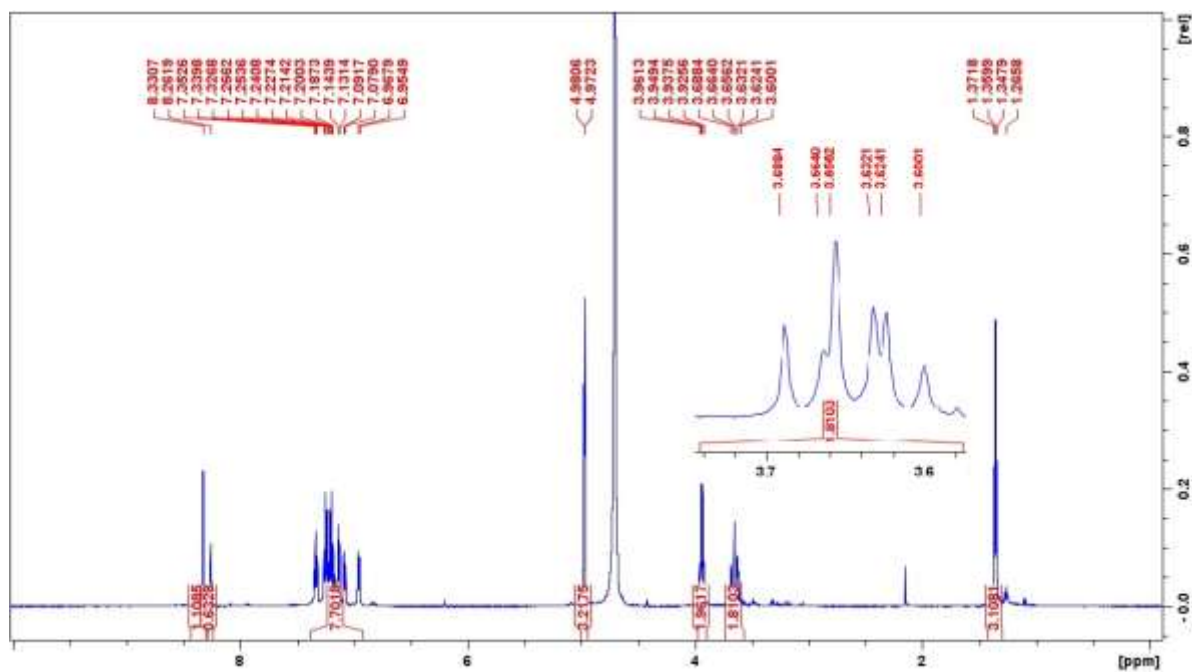

**Figure S71.** <sup>1</sup>H NMR spectrum of mixture of compounds **9a** and **10**

compound **9b**

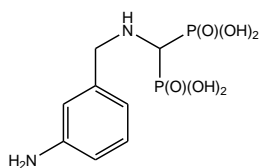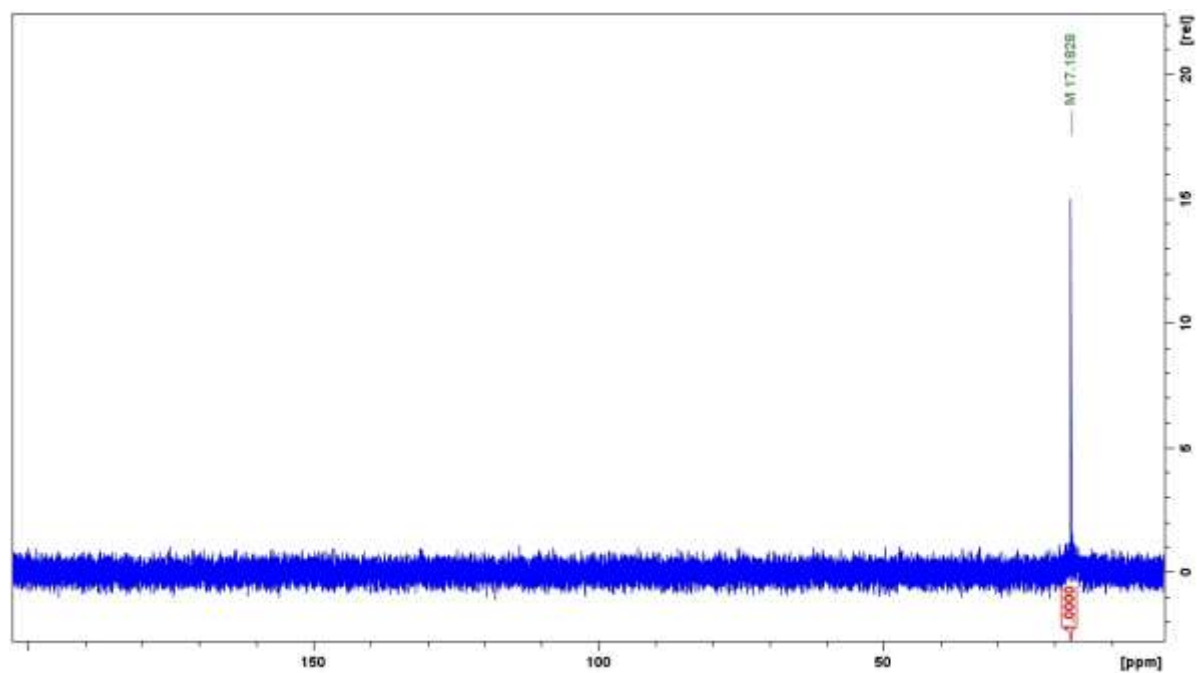

**Figure S72.** <sup>31</sup>P NMR spectrum of mixture of compounds **9b**

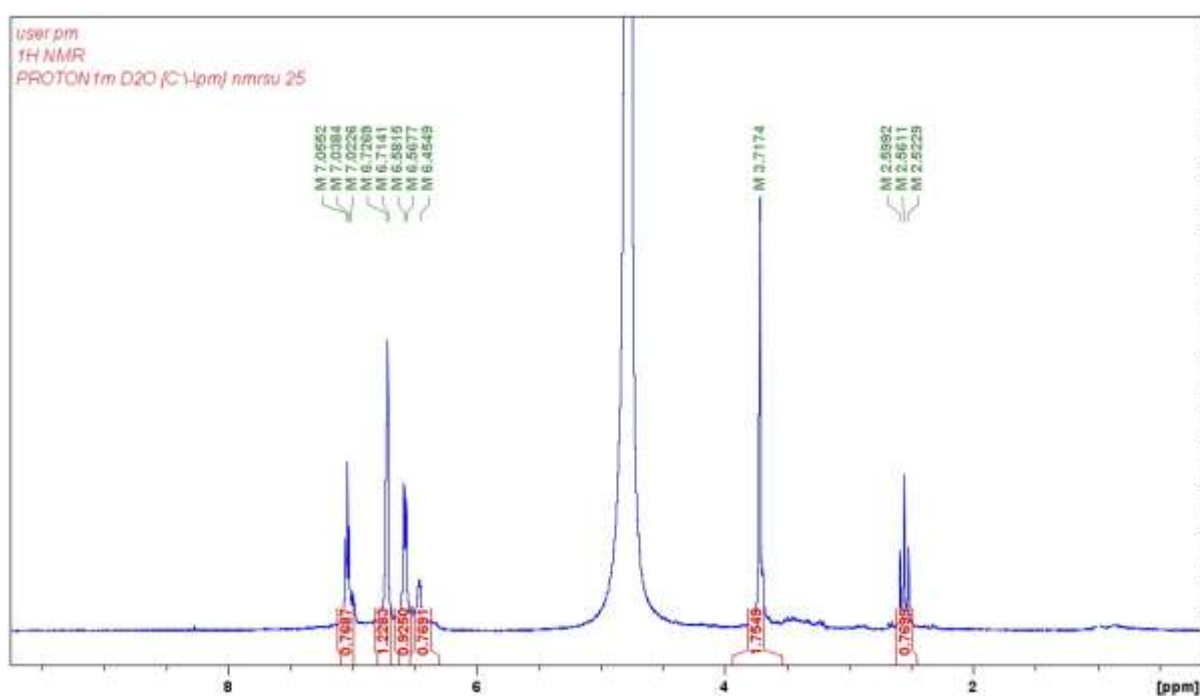

**Figure S73.** <sup>1</sup>H NMR spectrum of compound **9b**

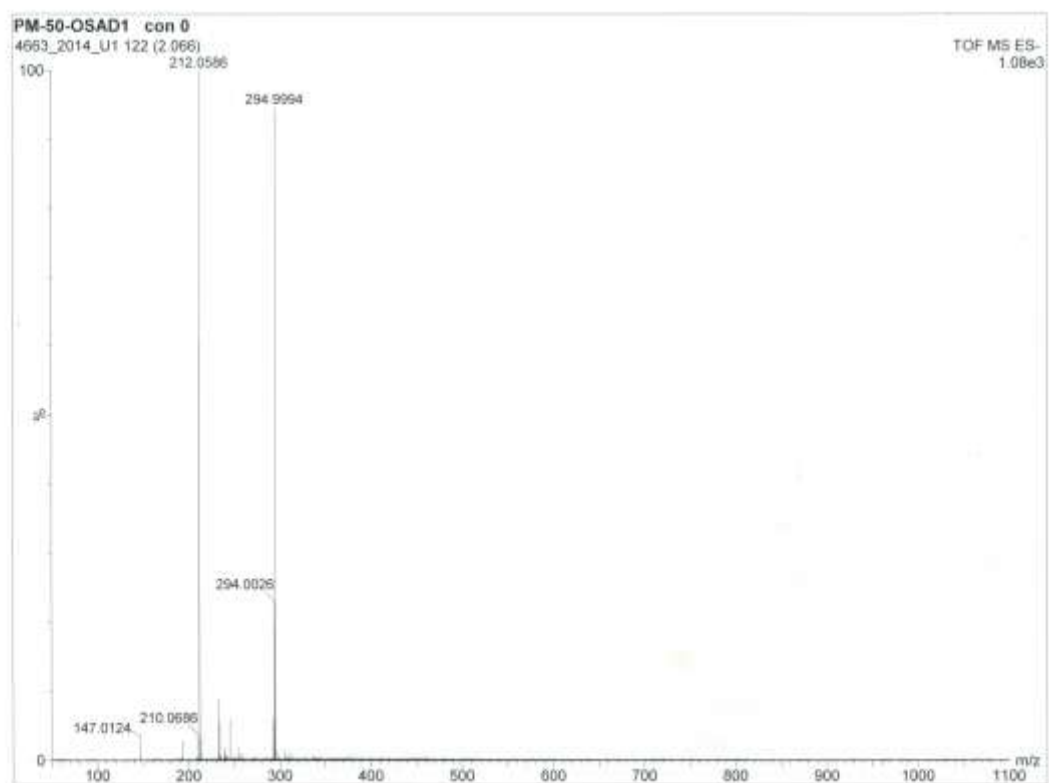

**Figure S74.** <sup>1</sup>H NMR spectrum of compound **9b**
